# Supplementary material
Source: PubMed Central journal article supplement (PMC7959887)
Supplement: NIHMS1675306-supplement-1.pdf [file NIHMS1675306-supplement-1.pdf]

**eBox 1. American Heart Association 2007 definition of those at high risk of developing infective endocarditis and who should receive antibiotic prophylaxis before invasive dental procedures.\***

---

**Those for Whom Antibiotic Prophylaxis Is Recommended According to the 2007 American Heart Association Guidelines**

High risk

- Prosthetic cardiac valve or prosthetic material used for valve repair
- Previous infective endocarditis
- Unrepaired cyanotic CHD,<sup>†</sup> including palliative shunts and conduits
- Completely repaired congenital heart defect with prosthetic material or device, whether placed by surgery or catheter intervention during the first 6 months after the procedure
- Repaired CHD with residual defects at the site or adjacent to the site of a prosthetic patch
- Cardiac transplantation recipients who develop cardiac valvulopathy

---

\*Source: Wilson and colleagues.<sup>4</sup> † CHD: Congenital heart disease.

**eTable 1.** *International Classification of Diseases*, Ninth Revision, Clinical Modification diagnosis and procedure codes and Current Procedural Terminology outpatient procedure codes used to identify high-risk cardiac conditions.\*

| CARDIAC CONDITION               | ICD-9-CM CODES (AND CPT OUTPATIENT PROCEDURE CODES)                                                                                                                                                                                                                                                                                                                                                                                                                                                                                                                                                                                                                                                                                                                                                                                                                                                                                                                                                                                                                                                                                                                                                                                                                                                                                                                                                                                                                                                                                                                                                                                                                                                                                                                                                                                                                                                                                                                                                                                                                                                                                                                                                                                                                                                                                                                                                                                                                                                                                                                                                                                                                                                                                                                                                                                                                                                                                                                                                                                                                                                                                                                                                                                                                                                                                                                                                                                                                                                                                                                |
|---------------------------------|--------------------------------------------------------------------------------------------------------------------------------------------------------------------------------------------------------------------------------------------------------------------------------------------------------------------------------------------------------------------------------------------------------------------------------------------------------------------------------------------------------------------------------------------------------------------------------------------------------------------------------------------------------------------------------------------------------------------------------------------------------------------------------------------------------------------------------------------------------------------------------------------------------------------------------------------------------------------------------------------------------------------------------------------------------------------------------------------------------------------------------------------------------------------------------------------------------------------------------------------------------------------------------------------------------------------------------------------------------------------------------------------------------------------------------------------------------------------------------------------------------------------------------------------------------------------------------------------------------------------------------------------------------------------------------------------------------------------------------------------------------------------------------------------------------------------------------------------------------------------------------------------------------------------------------------------------------------------------------------------------------------------------------------------------------------------------------------------------------------------------------------------------------------------------------------------------------------------------------------------------------------------------------------------------------------------------------------------------------------------------------------------------------------------------------------------------------------------------------------------------------------------------------------------------------------------------------------------------------------------------------------------------------------------------------------------------------------------------------------------------------------------------------------------------------------------------------------------------------------------------------------------------------------------------------------------------------------------------------------------------------------------------------------------------------------------------------------------------------------------------------------------------------------------------------------------------------------------------------------------------------------------------------------------------------------------------------------------------------------------------------------------------------------------------------------------------------------------------------------------------------------------------------------------------------------------|
| <b>Previous IE</b>              | ICD-9-CM diagnostic codes<br>4210 acute and subacute bacterial endocarditis<br>4211 acute and subacute infective endocarditis (in diseases classified elsewhere)<br>4219 acute endocarditis, unspecified                                                                                                                                                                                                                                                                                                                                                                                                                                                                                                                                                                                                                                                                                                                                                                                                                                                                                                                                                                                                                                                                                                                                                                                                                                                                                                                                                                                                                                                                                                                                                                                                                                                                                                                                                                                                                                                                                                                                                                                                                                                                                                                                                                                                                                                                                                                                                                                                                                                                                                                                                                                                                                                                                                                                                                                                                                                                                                                                                                                                                                                                                                                                                                                                                                                                                                                                                           |
| <b>Prosthetic Cardiac Valve</b> | ICD-9-CM procedure codes:<br>3505 endovascular replacement of aortic valve<br>3506 transapical replacement of aortic valve<br>3507 endovascular replacement of pulmonary valve<br>3508 transapical replacement of pulmonary valve<br>3509 endovascular replacement of unspecified heart valve<br>3520 open and other replacement of unspecified heart valve<br>3521 open and other replacement of aortic valve with tissue graft<br>3522 open and other replacement of aortic valve<br>3523 open and other replacement of mitral valve with tissue graft<br>3524 open and other replacement of mitral valve<br>3525 open and other replacement of pulmonary valve with tissue graft<br>3526 open and other replacement of pulmonary valve<br>3527 open and other replacement of tricuspid valve with tissue graft<br>3528 open and other replacement of tricuspid valve<br>3583 total repair of truncus arteriosus<br>CPT procedure codes<br>0256T Implantation of catheter-delivered prosthetic aortic heart valve; endovascular approach<br>0257T Implantation of catheter-delivered prosthetic aortic heart valve; open thoracic approach (eg, transapical, transventricular)<br>0258T Transthoracic cardiac exposure (eg, sternotomy, thoracotomy, subxiphoid) for catheter-delivered aortic valve replacement; without cardiopulmonary bypass<br>0268T Implantation of catheter-delivered prosthetic pulmonary valve, endovascular approach<br>0318T Implantation of catheter-delivered prosthetic aortic heart valve, open thoracic approach (eg, transapical, other than transaortic)<br>33361 Transcatheter aortic valve replacement (TAVR/TAVI) with prosthetic valve; percutaneous femoral artery approach<br>33362 Transcatheter aortic valve replacement (TAVR/TAVI) with prosthetic valve; open femoral artery approach<br>33363 Transcatheter aortic valve replacement (TAVR/TAVI) with prosthetic valve; open axillary artery approach<br>33364 Transcatheter aortic valve replacement (TAVR/TAVI) with prosthetic valve; open iliac artery approach<br>33365 Transcatheter aortic valve replacement (TAVR/TAVI) with prosthetic valve; transaortic approach (eg, median sternotomy, mediastinotomy)<br>33366 Transcatheter aortic valve replacement (TAVR/TAVI) with prosthetic valve; transapical exposure (eg, left thoracotomy)<br>33405 Replacement, aortic valve, with cardiopulmonary bypass; with prosthetic valve other than homograft or stentless valve<br>33406 Replacement, aortic valve, with cardiopulmonary bypass; with allograft valve (freehand)<br>33410 Replacement, aortic valve, with cardiopulmonary bypass; with stentless tissue valve<br>33411 Replacement, aortic valve; with aortic annulus enlargement, noncoronary sinus<br>33412 Replacement, aortic valve; with transventricular aortic annulus enlargement (Konno procedure)<br>33413 Replacement, aortic valve; by translocation of autologous pulmonary valve with allograft replacement of pulmonary valve (Ross procedure)<br>33430 Replacement, mitral valve, with cardiopulmonary bypass<br>33465 Replacement, tricuspid valve, with cardiopulmonary bypass<br>33475 Replacement, pulmonary valve<br>33477 Transcatheter pulmonary valve implantation, percutaneous approach, including pre-stenting of the valve delivery site, when performed<br>33496 Repair of non-structural prosthetic valve dysfunction with cardiopulmonary bypass (separate procedure)<br>ICD-9-CM diagnostic codes<br>99602 mechanical complication due to heart valve prosthesis |

\* Patients at high-risk of developing infective endocarditis (IE) were identified by determining whether they had been diagnosed with a high-risk condition (*International Classification of Diseases*, Ninth Revision, Clinical Modification [ICD-9-CM] codes) or undergone a high-risk procedure (ICD-9-CM or Current Procedural Terminology [CPT] codes) at any time before they first developed IE or at anytime for those who did not develop IE during the study period (within the available health care records for that patient). † Because the American Heart Association guidelines consider patients with congenital heart disease repaired with prosthetic material to be high risk only for the first 6 months after the procedure, they were treated as high risk for the first 6 months after the procedure only. Source: Centers for Disease Control and Prevention.<sup>11</sup> American Medical Association.<sup>13</sup>

eTable 1. Continued

| CARDIAC<br>CONDITION                                                                                  | ICD-9-CM CODES (AND CPT OUTPATIENT PROCEDURE CODES)                                                                                                                                                                                                                                                                                                                                                                                                                                                                                                                                                                                                                                                                                                                                                                                                                                                                                                                                                                                                                                                                                                                                                                                                                                                                                                                                                                                                                                                                                                                                                                                                                                                                                                                                                                                                                                                                                                                                                                                                                                                                                                                                                                                                                                                                                                                                                                                                                                      |
|-------------------------------------------------------------------------------------------------------|------------------------------------------------------------------------------------------------------------------------------------------------------------------------------------------------------------------------------------------------------------------------------------------------------------------------------------------------------------------------------------------------------------------------------------------------------------------------------------------------------------------------------------------------------------------------------------------------------------------------------------------------------------------------------------------------------------------------------------------------------------------------------------------------------------------------------------------------------------------------------------------------------------------------------------------------------------------------------------------------------------------------------------------------------------------------------------------------------------------------------------------------------------------------------------------------------------------------------------------------------------------------------------------------------------------------------------------------------------------------------------------------------------------------------------------------------------------------------------------------------------------------------------------------------------------------------------------------------------------------------------------------------------------------------------------------------------------------------------------------------------------------------------------------------------------------------------------------------------------------------------------------------------------------------------------------------------------------------------------------------------------------------------------------------------------------------------------------------------------------------------------------------------------------------------------------------------------------------------------------------------------------------------------------------------------------------------------------------------------------------------------------------------------------------------------------------------------------------------------|
|                                                                                                       | 99671 other complications due to heart valve prosthesis<br>v433 heart valve replaced by other means                                                                                                                                                                                                                                                                                                                                                                                                                                                                                                                                                                                                                                                                                                                                                                                                                                                                                                                                                                                                                                                                                                                                                                                                                                                                                                                                                                                                                                                                                                                                                                                                                                                                                                                                                                                                                                                                                                                                                                                                                                                                                                                                                                                                                                                                                                                                                                                      |
| <b>Prosthetic Material<br/>Used for Valve<br/>Repair</b>                                              | <p>ICD-9-CM procedure codes</p> <p>3533 annuloplasty</p> <p>3597 percutaneous mitral valve repair with implant</p> <p>CPT procedure codes</p> <p>0343T Transcatheter mitral valve repair percutaneous approach including transseptal puncture when performed; initial prosthesis</p> <p>0344T Transcatheter mitral valve repair percutaneous approach including transseptal puncture when performed; additional prosthesis(es) during same session (List separately in addition to code for primary procedure)</p> <p>33391 Valvuloplasty, aortic valve, open, with cardiopulmonary bypass; complex (eg, leaflet extension, leaflet resection, leaflet reconstruction, or annuloplasty)</p> <p>33418 Transcatheter mitral valve repair, percutaneous approach, including transseptal puncture when performed; initial prosthesis</p> <p>33419 Transcatheter mitral valve repair, percutaneous approach, including transseptal puncture when performed; additional prosthesis(es) during same session (List separately in addition to code for primary procedure)</p> <p>33426 Valvuloplasty, mitral valve, with cardiopulmonary bypass; with prosthetic ring</p> <p>33427 Valvuloplasty, mitral valve, with cardiopulmonary bypass; radical reconstruction, with or without ring</p> <p>33464 Valvuloplasty, tricuspid valve; with ring insertion</p> <p>33468 Tricuspid valve repositioning and plication for Ebstein anomaly</p> <p>33478 Outflow tract augmentation (gusset), with or without commissurotomy or infundibular resection</p> <p>33600 Closure of atrioventricular valve (mitral or tricuspid) by suture or patch</p> <p>33602 Closure of semilunar valve (aortic or pulmonary) by suture or patch</p> <p>33612 Repair of double outlet right ventricle with intraventricular tunnel repair; with repair of right ventricular outflow tract obstruction</p> <p>33860 Ascending aorta graft, with cardiopulmonary bypass, includes valve suspension, when performed</p> <p>33861 Ascending aorta graft, with cardiopulmonary bypass, with or without valve suspension; with coronary reconstruction</p> <p>33863 Ascending aorta graft, with cardiopulmonary bypass, with aortic root replacement using valved conduit and coronary reconstruction (eg, Bentall)</p> <p>33864 Ascending aorta graft, with cardiopulmonary bypass with valve suspension, with coronary reconstruction and valve-sparing aortic root remodeling (eg, David Procedure, Yacoub Procedure)</p> |
| <b>Unrepaired Cyanotic<br/>Congenital Heart<br/>Disease</b>                                           | <p>ICD-9-CM diagnostic codes</p> <p>7450 common truncus</p> <p>74510 complete transposition of great vessels</p> <p>74511 double outlet right ventricle</p> <p>74519 other transposition of great vessels</p> <p>7452 tetralogy of Fallot</p> <p>7453 common ventricle</p> <p>74560 endocardial cushion defects</p> <p>7457 cor biloculare</p> <p>74741 total anomalous pulmonary venous connection</p>                                                                                                                                                                                                                                                                                                                                                                                                                                                                                                                                                                                                                                                                                                                                                                                                                                                                                                                                                                                                                                                                                                                                                                                                                                                                                                                                                                                                                                                                                                                                                                                                                                                                                                                                                                                                                                                                                                                                                                                                                                                                                  |
| <b>Congenital Heart<br/>Condition in Whom a<br/>Palliative Shunt or<br/>Conduit Has Been<br/>Used</b> | <p>ICD-9-CM procedure codes</p> <p>3541 enlargement of existing arterial septal defect</p> <p>3542 creation of septal defect in heart</p> <p>3591 interatrial transposition of venous return</p> <p>3592 creation of conduit between right ventricle and pulmonary artery</p> <p>3593 creation of conduit between left ventricle and aorta</p> <p>3594 creation of conduit between atrium and pulmonary artery</p>                                                                                                                                                                                                                                                                                                                                                                                                                                                                                                                                                                                                                                                                                                                                                                                                                                                                                                                                                                                                                                                                                                                                                                                                                                                                                                                                                                                                                                                                                                                                                                                                                                                                                                                                                                                                                                                                                                                                                                                                                                                                       |

| CARDIAC<br>CONDITION | ICD-9-CM CODES (AND CPT OUTPATIENT PROCEDURE CODES)                                                                                                                                            |
|----------------------|------------------------------------------------------------------------------------------------------------------------------------------------------------------------------------------------|
|                      | 390 systemic to pulmonary shunt                                                                                                                                                                |
|                      | 3921 caval-pulmonary artery anastomosis                                                                                                                                                        |
|                      | CPT procedure codes                                                                                                                                                                            |
|                      | 33404 Construction of apical-aortic conduit                                                                                                                                                    |
|                      | 33606 Anastomosis of pulmonary artery to aorta (Damus-Kaye-Stansel procedure)                                                                                                                  |
|                      | 33608 Repair of complex cardiac anomaly other than pulmonary atresia with ventricular septal defect by construction or replacement of conduit from right or left ventricle to pulmonary artery |
|                      | 33610 Repair of complex cardiac anomalies (eg, single ventricle with subaortic obstruction) by surgical enlargement of ventricular septal defect                                               |
|                      | 33611 Repair of double outlet right ventricle with intraventricular tunnel repair;                                                                                                             |
|                      | 33612 Repair of double outlet right ventricle with intraventricular tunnel repair; with repair of right ventricular outflow tract obstruction                                                  |
|                      | 33615 Repair of complex cardiac anomalies (eg, tricuspid atresia) by closure of atrial septal defect and anastomosis of atria or vena cava to pulmonary artery (simple Fontan procedure)       |
|                      | 33617 Repair of complex cardiac anomalies (eg, single ventricle) by modified Fontan procedure                                                                                                  |
|                      | 33619 Repair of single ventricle with aortic outflow obstruction and aortic arch hypoplasia (hypoplastic left heart syndrome) (eg, Norwood procedure)                                          |
|                      | 33697 Complete repair tetralogy of Fallot with pulmonary atresia including construction of conduit from right ventricle to pulmonary artery and closure of ventricular septal defect           |
|                      | 33735 Atrial septectomy or septostomy; closed heart (Blalock-Hanlon type operation)                                                                                                            |
|                      | 33736 Atrial septectomy or septostomy; open heart with cardiopulmonary bypass                                                                                                                  |
|                      | 33737 Atrial septectomy or septostomy; open heart, with inflow occlusion                                                                                                                       |
|                      | 33750 Shunt; subclavian to pulmonary artery (Blalock-Taussig type operation)                                                                                                                   |
|                      | 33755 Shunt; ascending aorta to pulmonary artery (Waterston type operation)                                                                                                                    |
|                      | 33762 Shunt; descending aorta to pulmonary artery (Potts-Smith type operation)                                                                                                                 |
|                      | 33764 Shunt; central, with prosthetic graft                                                                                                                                                    |
|                      | 33766 Shunt; superior vena cava to pulmonary artery for flow to 1 lung (classical Glenn procedure)                                                                                             |
|                      | 33767 Shunt; superior vena cava to pulmonary artery for flow to both lungs (bidirectional Glenn procedure)                                                                                     |
|                      | 33768 Anastomosis, cavopulmonary, second superior vena cava (List separately in addition to primary procedure)                                                                                 |
|                      | 33774 Repair of transposition of the great arteries, atrial baffle procedure (eg, Mustard or Senning type) with cardiopulmonary bypass;                                                        |
|                      | 33775 Repair of transposition of the great arteries, atrial baffle procedure (eg, Mustard or Senning type) with cardiopulmonary bypass; with removal of pulmonary band                         |
|                      | 33776 Repair of transposition of the great arteries, atrial baffle procedure (eg, Mustard or Senning type) with cardiopulmonary bypass; with closure of ventricular septal defect              |
|                      | 33777 Repair of transposition of the great arteries, atrial baffle procedure (eg, Mustard or Senning type) with cardiopulmonary bypass; with repair of subpulmonic obstruction                 |
|                      | 33782 Aortic root translocation with ventricular septal defect and pulmonary stenosis repair (ie, Nikaidoh procedure); without coronary ostium reimplantation                                  |
|                      | 33783 Aortic root translocation with ventricular septal defect and pulmonary stenosis repair (ie, Nikaidoh procedure); with reimplantation of 1 or both coronary ostia                         |
|                      | 33786 Total repair, truncus arteriosus (Rastelli type operation)                                                                                                                               |
|                      | 33918 Repair of pulmonary atresia with ventricular septal defect, by unifocalization of pulmonary arteries; without cardiopulmonary bypass                                                     |
|                      | 33920 Repair of pulmonary atresia with ventricular septal defect, by construction or replacement of conduit from right or left ventricle to pulmonary artery                                   |
|                      | 92992 Atrial septectomy or septostomy; transvenous method, balloon (eg, Rashkind type) (includes cardiac catheterization)                                                                      |
|                      | 92993 Atrial septectomy or septostomy; blade method (Park septostomy) (includes cardiac catheterization)                                                                                       |

eTable 1. Continued

| CARDIAC<br>CONDITION                                                                                                                                                                                                                               | ICD-9-CM CODES (AND CPT OUTPATIENT PROCEDURE CODES)                                                                                                                                                                                                                                                                                                                                                                                                                                                                                                                                                                                                                                                                                                                                                                                                                                                                                                                                                                                                                                                                                                                                                                                                                                                                                                                                                                                                                                                                                                                                                                                                                                                                                                                                                                                                                                                                                                                                                                                                                                                                                                                                                                                                                                                                                                                                                                                                                                                                                                                                                                                                                                                                                                                                                                                                                                                                                                                                                                                                                                                                                                                                                                                                                                                                                                                                                                                                                                                                                                                                                                                                                                                                                                                                                                                                                                                                                                                                                                                                                                                                                                                                                                                                                                                                                                                                                                                                                                                                                                                                                                                                     |
|----------------------------------------------------------------------------------------------------------------------------------------------------------------------------------------------------------------------------------------------------|---------------------------------------------------------------------------------------------------------------------------------------------------------------------------------------------------------------------------------------------------------------------------------------------------------------------------------------------------------------------------------------------------------------------------------------------------------------------------------------------------------------------------------------------------------------------------------------------------------------------------------------------------------------------------------------------------------------------------------------------------------------------------------------------------------------------------------------------------------------------------------------------------------------------------------------------------------------------------------------------------------------------------------------------------------------------------------------------------------------------------------------------------------------------------------------------------------------------------------------------------------------------------------------------------------------------------------------------------------------------------------------------------------------------------------------------------------------------------------------------------------------------------------------------------------------------------------------------------------------------------------------------------------------------------------------------------------------------------------------------------------------------------------------------------------------------------------------------------------------------------------------------------------------------------------------------------------------------------------------------------------------------------------------------------------------------------------------------------------------------------------------------------------------------------------------------------------------------------------------------------------------------------------------------------------------------------------------------------------------------------------------------------------------------------------------------------------------------------------------------------------------------------------------------------------------------------------------------------------------------------------------------------------------------------------------------------------------------------------------------------------------------------------------------------------------------------------------------------------------------------------------------------------------------------------------------------------------------------------------------------------------------------------------------------------------------------------------------------------------------------------------------------------------------------------------------------------------------------------------------------------------------------------------------------------------------------------------------------------------------------------------------------------------------------------------------------------------------------------------------------------------------------------------------------------------------------------------------------------------------------------------------------------------------------------------------------------------------------------------------------------------------------------------------------------------------------------------------------------------------------------------------------------------------------------------------------------------------------------------------------------------------------------------------------------------------------------------------------------------------------------------------------------------------------------------------------------------------------------------------------------------------------------------------------------------------------------------------------------------------------------------------------------------------------------------------------------------------------------------------------------------------------------------------------------------------------------------------------------------------------------------------------------|
| <b>Completely Repaired<br/>Congenital Heart<br/>Disease Defect With<br/>Prosthetic Material<br/>or Device, Whether<br/>Placed Via Surgery or<br/>Catheter<br/>Intervention, During<br/>First 6 Months After<br/>the Procedure Only<sup>†</sup></b> | <p>ICD-9-CM procedure codes</p> <p>3550 repair of unspecified septal defect of heart with prosthesis</p> <p>3551 repair of atrial septal defect with prosthesis, open technique</p> <p>3552 repair of atrial septal defect with prosthesis, closed technique</p> <p>3553 repair of ventricular septal defect with prosthesis, open technique</p> <p>3554 repair of endocardial cushion defect with prosthesis</p> <p>3555 repair of ventricular septal defect with prosthesis, closed technique</p> <p>3560 repair of unspecified septal defect of heart with tissue graft</p> <p>3561 repair of atrial septal defect with tissue graft</p> <p>3562 repair of ventricular septal defect with tissue graft</p> <p>3563 repair of endocardial cushion defect with tissue graft</p> <p>3570 other and unspecified repair of unspecified septal defect of heart</p> <p>3571 other and unspecified repair of atria septal defect</p> <p>3572 other and unspecified repair of ventricular septal defect</p> <p>3573 other and unspecified repair of endocardial cushion defect</p> <p>3581 total repair of tetralogy of Fallot</p> <p>3582 total repair of total anomalous pulmonary venous connection</p> <p>3584 total correction of transposition of great vessels</p> <p>3598 other operations on septa of heart</p> <p>CPT procedure codes</p> <p>0166T Transmyocardial transcatheter closure of ventricular septal defect, with implant; without cardiopulmonary bypass</p> <p>0167T Transmyocardial transcatheter closure of ventricular septal defect, with implant; with cardiopulmonary bypass</p> <p>33545 Repair of postinfarction ventricular septal defect, with or without myocardial resection</p> <p>33641 Repair atrial septal defect, secundum, with cardiopulmonary bypass, with or without patch</p> <p>33645 Direct or patch closure, sinus venosus, with or without anomalous pulmonary venous drainage</p> <p>33647 Repair of atrial septal defect and ventricular septal defect, with direct or patch closure</p> <p>33660 Repair of incomplete or partial atrioventricular canal (ostium primum atrial septal defect), with or without atrioventricular valve repair</p> <p>33665 Repair of intermediate or transitional atrioventricular canal, with or without atrioventricular valve repair</p> <p>33670 Repair of complete atrioventricular canal, with or without prosthetic valve</p> <p>33675 Closure of multiple ventricular septal defects;</p> <p>33676 Closure of multiple ventricular septal defects; with pulmonary valvotomy or infundibular resection (acyanotic)</p> <p>33677 Closure of multiple ventricular septal defects; with removal of pulmonary artery band, with or without gusset</p> <p>33681 Closure of single ventricular septal defect, with or without patch;</p> <p>33684 Closure of single ventricular septal defect, with or without patch; with pulmonary valvotomy or infundibular resection (acyanotic)</p> <p>33688 Closure of single ventricular septal defect, with or without patch; with removal of pulmonary artery band, with or without gusset</p> <p>33692 Complete repair tetralogy of Fallot without pulmonary atresia;</p> <p>33694 Complete repair tetralogy of Fallot without pulmonary atresia; with transannular patch</p> <p>33710 Repair sinus of Valsalva fistula, with cardiopulmonary bypass; with repair of ventricular septal defect</p> <p>33770 Repair of transposition of the great arteries with ventricular septal defect and subpulmonary stenosis; without surgical enlargement of ventricular septal defect</p> <p>33771 Repair of transposition of the great arteries with ventricular septal defect and subpulmonary stenosis; with surgical enlargement of ventricular septal defect</p> <p>33778 Repair of transposition of the great arteries, aortic pulmonary artery reconstruction (eg, Jatene type);</p> <p>33779 Repair of transposition of the great arteries, aortic pulmonary artery reconstruction (eg, Jatene type); with removal of pulmonary band</p> <p>33780 Repair of transposition of the great arteries, aortic pulmonary artery reconstruction (eg, Jatene type); with closure of ventricular septal defect</p> <p>33781 Repair of transposition of the great arteries, aortic pulmonary artery reconstruction (eg, Jatene type); with repair of subpulmonic obstruction</p> <p>93580 Percutaneous transcatheter closure of congenital interatrial communication (ie, Fontan fenestration, atrial septal defect) with implant</p> <p>93581 Percutaneous transcatheter closure of a congenital ventricular septal defect with implant</p> |

**eTable 2.** *International Classification of Diseases, Ninth Revision, Clinical Modification* Diagnosis and Procedure Codes and Current Procedural Terminology outpatient procedure codes used to identify moderate-risk cardiac conditions.\*

| CARDIAC CONDITION                  | ICD-9-CM CODES                                                                                                                                                                                                                                                                                                                                                                                                                                                                                                                                                                                                                                                                                                                                                                                                                                                                                                                                                                                                                                                                                                                                                                                                                                                                   |
|------------------------------------|----------------------------------------------------------------------------------------------------------------------------------------------------------------------------------------------------------------------------------------------------------------------------------------------------------------------------------------------------------------------------------------------------------------------------------------------------------------------------------------------------------------------------------------------------------------------------------------------------------------------------------------------------------------------------------------------------------------------------------------------------------------------------------------------------------------------------------------------------------------------------------------------------------------------------------------------------------------------------------------------------------------------------------------------------------------------------------------------------------------------------------------------------------------------------------------------------------------------------------------------------------------------------------|
| <b>Previous Rheumatic Fever</b>    | ICD-9-CM diagnostic codes<br>390 rheumatic fever without heart involvement<br>3910 acute rheumatic pericarditis<br>3911 acute rheumatic endocarditis<br>3912 acute rheumatic myocarditis<br>3918 other acute rheumatic heart disease<br>3919 acute rheumatic heart disease, unspecified<br>3920 rheumatic chorea with heart involvement<br>3929 rheumatic chorea without heart involvement<br>3941 rheumatic mitral insufficiency<br>3940 mitral stenosis<br>3942 mitral stenosis with insufficiency<br>3949 other unspecified mitral disease<br>3950 rheumatic aortic stenosis<br>3951 rheumatic aortic insufficiency<br>3952 rheumatic aortic stenosis with insufficiency<br>3959 other and unspecified aortic rheumatic diseases<br>3960 mitral and aortic stenosis<br>3961 mitral stenosis and aortic insufficiency<br>3962 mitral insufficiency and aortic stenosis<br>3963 mitral insufficiency and aortic insufficiency<br>3968 multiple involvement of mitral and aortic valves<br>3969 mitral and aortic valve disease unspecified<br>3970 diseases of tricuspid valve<br>3971 rheumatic diseases of pulmonary valve<br>3979 rheumatic diseases of endocardium, valve unspecified<br>39890 rheumatic heart disease, unspecified<br>39899 other rheumatic heart diseases |
| <b>Nonrheumatic Valve Disease</b>  | ICD-9-CM diagnostic codes<br>4240 mitral valve disorders<br>4241 aortic valve disorders<br>4242 tricuspid valve disorders specified as non-rheumatic<br>4243 pulmonary valve disorders                                                                                                                                                                                                                                                                                                                                                                                                                                                                                                                                                                                                                                                                                                                                                                                                                                                                                                                                                                                                                                                                                           |
| <b>Hypertrophic Cardiomyopathy</b> | ICD-9-CM diagnostic codes<br>42511 hypertrophic obstructive cardiomyopathy<br>42518 other hypertrophic cardiomyopathy                                                                                                                                                                                                                                                                                                                                                                                                                                                                                                                                                                                                                                                                                                                                                                                                                                                                                                                                                                                                                                                                                                                                                            |
| <b>Congenital Valve Anomalies</b>  | ICD-9-CM diagnostic codes<br>74600 congenital pulmonary valve anomaly, unspecified<br>74601 atresia of pulmonary valve, congenital<br>74602 stenosis of pulmonary valve, congenital<br>74609 other congenital anomalies of pulmonary valve<br>7461 tricuspid atresia and stenosis, congenital<br>7462 Ebstein's anomaly<br>7463 congenital stenosis of aortic valve<br>7464 congenital insufficiency of aortic valve<br>7465 congenital mitral stenosis<br>7466 congenital mitral insufficiency<br>7467 hyperplastic left heart syndrome<br>74681 sub-aortic stenosis<br>74683 infundibular pulmonic stenosis<br>74689 other specified congenital heart anomalies of heart                                                                                                                                                                                                                                                                                                                                                                                                                                                                                                                                                                                                       |

\* Patients at moderate risk of developing infective endocarditis (IE) were identified by determining whether they had been diagnosed with a moderate-risk condition (*International Classification of Diseases, Ninth Revision, Clinical Modification* [ICD-9-CM] codes) at any time before they first developed IE or at any time for those who did not develop IE during the study period (within the available health care records for that patient). Source: Centers for Disease Control and Prevention.<sup>13</sup> American Medical Association.<sup>13</sup>

## **eBox 2. Dental procedures for which endocarditis prophylaxis is reasonable according to the 2007 American Heart Association guidelines.\***

---

### **Dental Procedure**

- All dental procedures that involve manipulation of gingival tissue or the periapical region of teeth or perforation of the oral mucosa.\*

---

\*The following procedures and events do not need prophylaxis: routine anesthetic injections through noninfected tissue, obtaining dental radiographs, placement of removable prosthodontic or orthodontic appliances, adjustment of orthodontic appliances, placement of orthodontic brackets, shedding of primary teeth, and bleeding from trauma to the lips or oral mucosa. Source: Wilson and colleagues.<sup>4</sup>

**eTable 3.** American Dental Association Code on Dental Procedures and Nomenclature 2017 Codes for identifying invasive dental procedures, effective January 1, 2017.

| CODE                              | PROCEDURE                                                                                                            |
|-----------------------------------|----------------------------------------------------------------------------------------------------------------------|
| <b>D0100-D0999 Diagnostic</b>     |                                                                                                                      |
| Clinical oral evaluations         |                                                                                                                      |
| D0120 <sup>†</sup>                | Periodic oral evaluation-established patient                                                                         |
| D0140 <sup>‡</sup>                | Limited oral evaluation-problem focused                                                                              |
| D0145 <sup>‡</sup>                | Oral evaluation for a patient under 3 years of age and counseling with primary caregiver                             |
| D0150 <sup>†</sup>                | Comprehensive oral evaluation-new or established patient                                                             |
| D0160 <sup>‡</sup>                | Detailed and extensive oral evaluation-problem focused, by report                                                    |
| D0170 <sup>‡</sup>                | Re-evaluation-limited, problem focused (established patient; not postoperative visit)                                |
| D0171 <sup>‡</sup>                | Re-evaluation-postoperative office visit                                                                             |
| D0180*                            | Comprehensive periodontal evaluation-new or established patient                                                      |
| Prediagnostic services            |                                                                                                                      |
| D0190 <sup>‡</sup>                | Screening of a patient                                                                                               |
| D0191 <sup>‡</sup>                | Assessment of a patient                                                                                              |
| Diagnostic imaging                |                                                                                                                      |
| Image capture with interpretation |                                                                                                                      |
| D0210 <sup>‡</sup>                | Intraoral-complete series of radiographic images                                                                     |
| D0220 <sup>‡</sup>                | Intraoral-periapical first radiographic image                                                                        |
| D0230 <sup>‡</sup>                | Intraoral-periapical each additional radiographic image                                                              |
| D0240 <sup>‡</sup>                | Intraoral-occlusal radiographic image                                                                                |
| D0250 <sup>‡</sup>                | Extraoral-2-dimensional (2D) projection radiographic image created using a stationary radiation source, and detector |
| D0251 <sup>‡</sup>                | Extraoral posterior dental radiographic image                                                                        |
| D0270 <sup>‡</sup>                | Bite-wing-single radiographic image                                                                                  |
| D0272 <sup>‡</sup>                | Bite-wings-2 radiographic images                                                                                     |
| D0273 <sup>‡</sup>                | Bite-wings-3 radiographic images                                                                                     |
| D0274 <sup>‡</sup>                | Bite-wings-4 radiographic images                                                                                     |
| D0277 <sup>‡</sup>                | Vertical bite-wings-7 to 8 radiographic images                                                                       |
| D0290 <sup>‡</sup>                | Posterior-anterior or lateral skull and facial bone survey radiographic image                                        |
| D0310 <sup>‡</sup>                | Sialography                                                                                                          |
| D0320 <sup>‡</sup>                | Temporomandibular joint (TMJ) arthrogram, including injection                                                        |
| D0321 <sup>‡</sup>                | Other TMJ radiographic images, by report                                                                             |
| D0322 <sup>‡</sup>                | Tomographic survey                                                                                                   |
| D0330 <sup>‡</sup>                | Panoramic radiographic image                                                                                         |
| D0340 <sup>‡</sup>                | 2D cephalometric radiographic image-acquisition, measurement and analysis                                            |
| D0350 <sup>‡</sup>                | 2D oral/facial photographic image obtained intra-orally or extra-orally                                              |
| D0351 <sup>‡</sup>                | 3-dimensional (3D) photographic image                                                                                |
| D0364 <sup>‡</sup>                | Cone beam computed tomography (CT) capture and interpretation with limited field of view – less than 1 whole jaw     |
| D0365 <sup>‡</sup>                | Cone beam CT capture and interpretation with field of view of 1 full dental arch – mandible                          |

\* Invasive dental procedure that "should" be covered with antibiotic prophylaxis. † Invasive dental procedures that "may" be covered with antibiotic prophylaxis. ‡ Noninvasive. § Porcelain/ceramic inlays/onlays include all indirect ceramic and porcelain type inlays/onlays. ¶ Resin-based composite inlays/onlays must utilize indirect technique. # All codes in this section are ordered alphabetically and not numerically. Source: American Dental Association.<sup>16</sup>



**eTable 3.** Continued

| <b>CODE</b>                            | <b>PROCEDURE</b>                                                                                                                                                          |
|----------------------------------------|---------------------------------------------------------------------------------------------------------------------------------------------------------------------------|
| D0366 <sup>+</sup>                     | Cone beam CT capture and interpretation with field of view of 1 full dental arch – maxilla, with or without cranium                                                       |
| D0367 <sup>+</sup>                     | Cone beam CT capture and interpretation with field of view of both jaws; with or without cranium                                                                          |
| D0368 <sup>+</sup>                     | Cone beam CT capture and interpretation for TMJ series including 2 or more exposures                                                                                      |
| D0369 <sup>+</sup>                     | Maxillofacial magnetic resonance imaging (MRI) capture and interpretation                                                                                                 |
| D0370 <sup>+</sup>                     | Maxillofacial ultrasound capture and interpretation                                                                                                                       |
| D0371 <sup>+</sup>                     | Sialoendoscopy capture and interpretation                                                                                                                                 |
| Image capture only                     |                                                                                                                                                                           |
| D0380 <sup>+</sup>                     | Cone beam CT image capture with limited field of view – less than 1 whole jaw                                                                                             |
| D0381 <sup>+</sup>                     | Cone beam CT image capture with field of view of 1 full dental arch – mandible                                                                                            |
| D0382 <sup>+</sup>                     | Cone beam CT image capture with field of view of 1 full dental arch – maxilla, with or without cranium                                                                    |
| D0383 <sup>+</sup>                     | Cone beam CT image capture with field of view of both jaws; with or without cranium                                                                                       |
| D0384 <sup>+</sup>                     | Cone beam CT image capture for TMJ series including 2 or more exposures                                                                                                   |
| D0385 <sup>+</sup>                     | Maxillofacial MRI image capture                                                                                                                                           |
| D0386 <sup>+</sup>                     | Maxillofacial ultrasound image capture                                                                                                                                    |
| Interpretation and report only         |                                                                                                                                                                           |
| D0391 <sup>+</sup>                     | Interpretation of diagnostic image by a practitioner not associated with capture of the image, including report                                                           |
| Post processing of image or image sets |                                                                                                                                                                           |
| D0393 <sup>+</sup>                     | Treatment simulation using 3D image volume                                                                                                                                |
| D0394 <sup>+</sup>                     | Digital subtraction of 2 or more images or image volumes of the same modality                                                                                             |
| D0395 <sup>+</sup>                     | Fusion of 2 or more 3D image volumes of 1 or more modalities                                                                                                              |
| Tests and examinations                 |                                                                                                                                                                           |
| D0414 <sup>+</sup>                     | Laboratory processing of microbial specimen to include culture and sensitivity studies, preparation and transmission of written report                                    |
| D0415 <sup>+</sup>                     | Collection of microorganisms for culture and sensitivity                                                                                                                  |
| D0416 <sup>+</sup>                     | Viral culture                                                                                                                                                             |
| D0417 <sup>+</sup>                     | Collection and preparation of saliva sample for laboratory diagnostic testing                                                                                             |
| D0418 <sup>+</sup>                     | Analysis of saliva sample                                                                                                                                                 |
| D0422 <sup>+</sup>                     | Collection and preparation of genetic sample material for laboratory analysis and report                                                                                  |
| D0423 <sup>+</sup>                     | Genetic test for susceptibility to disease-specimen analysis                                                                                                              |
| D0425 <sup>+</sup>                     | Caries susceptibility tests                                                                                                                                               |
| D0431 <sup>+</sup>                     | Adjunctive pre-diagnostic test that aids in detection of mucosal abnormalities including premalignant and malignant lesions, not to include cytology or biopsy procedures |
| D0460 <sup>+</sup>                     | Pulp vitality tests                                                                                                                                                       |
| D0470 <sup>+</sup>                     | Diagnostic casts                                                                                                                                                          |
| D0600 <sup>+</sup>                     | Nonionizing diagnostic procedure capable of quantifying, monitoring and recording changes in structure of enamel, dentin and cementum                                     |
| D0601 <sup>+</sup>                     | Caries risk assessment and documentation, with a finding of low risk                                                                                                      |
| D0602 <sup>+</sup>                     | Caries risk assessment and documentation, with a finding of moderate risk                                                                                                 |

eTable 3. Continued

| CODE                                          | PROCEDURE                                                                                                                                                                |
|-----------------------------------------------|--------------------------------------------------------------------------------------------------------------------------------------------------------------------------|
| D0603 <sup>‡</sup>                            | Caries risk assessment and documentation, with a finding of high risk                                                                                                    |
| Oral pathology laboratory                     |                                                                                                                                                                          |
| D0472*                                        | Accession of tissue, gross examination, preparation and transmission of written report                                                                                   |
| D0473*                                        | Accession of tissue, gross and microscopic examination, preparation and transmission of written report                                                                   |
| D0474*                                        | Accession of tissue, gross and microscopic examination, including assessment of surgical margins for presence of disease, preparation and transmission of written report |
| D0480 <sup>‡</sup>                            | Accession of exfoliative cytologic smears, microscopic examination, preparation and transmission of written report                                                       |
| D0486 <sup>‡</sup>                            | Laboratory accession of transepithelial cytologic sample, microscopic examination, preparation and transmission of written report                                        |
| D0475 <sup>‡</sup>                            | Decalcification procedure                                                                                                                                                |
| D0476 <sup>‡</sup>                            | Special stains for microorganisms                                                                                                                                        |
| D0477 <sup>‡</sup>                            | Special stains, not for microorganisms                                                                                                                                   |
| D0478 <sup>‡</sup>                            | Immunohistochemical stains                                                                                                                                               |
| D0479 <sup>‡</sup>                            | Tissue in-situ hybridization, including interpretation                                                                                                                   |
| D0481 <sup>‡</sup>                            | Electron microscopy                                                                                                                                                      |
| D0482 <sup>‡</sup>                            | Direct immunofluorescence                                                                                                                                                |
| D0483 <sup>‡</sup>                            | Indirect immunofluorescence                                                                                                                                              |
| D0484 <sup>‡</sup>                            | Consultation on slides prepared elsewhere                                                                                                                                |
| D0485 <sup>‡</sup>                            | Consultation, including preparation of slides from biopsy material supplied by referring source                                                                          |
| D0502 <sup>‡</sup>                            | Other oral pathology procedures, by report                                                                                                                               |
| D0999 <sup>‡</sup>                            | Unspecified diagnostic procedure, by report                                                                                                                              |
| <b>D1000-D1999 Preventive</b>                 |                                                                                                                                                                          |
| Dental prophylaxis                            |                                                                                                                                                                          |
| D1110*                                        | Prophylaxis-adult                                                                                                                                                        |
| D1120*                                        | Prophylaxis-child                                                                                                                                                        |
| Topical fluoride treatment (office procedure) |                                                                                                                                                                          |
| D1206 <sup>‡</sup>                            | Topical application of fluoride varnish                                                                                                                                  |
| D1208 <sup>‡</sup>                            | Topical application of fluoride-excluding varnish                                                                                                                        |
| Other preventive services                     |                                                                                                                                                                          |
| D1310 <sup>‡</sup>                            | Nutritional counseling for control of dental disease                                                                                                                     |
| D1320 <sup>‡</sup>                            | Tobacco counseling for the control and prevention of oral disease                                                                                                        |
| D1330 <sup>‡</sup>                            | Oral hygiene instructions                                                                                                                                                |
| D1351 <sup>‡</sup>                            | Sealant-per tooth                                                                                                                                                        |
| D1353 <sup>‡</sup>                            | Sealant repair-per tooth                                                                                                                                                 |
| D1352 <sup>‡</sup>                            | Preventive resin restoration in a moderate to high caries risk patient – permanent tooth                                                                                 |
| D1354 <sup>‡</sup>                            | Interim caries arresting medicament application                                                                                                                          |
| Space maintenance (passive appliances)        |                                                                                                                                                                          |
| D1510 <sup>‡</sup>                            | Space maintainer-fixed-unilateral                                                                                                                                        |
| D1515 <sup>‡</sup>                            | Space maintainer-fixed-bilateral                                                                                                                                         |
| D1520 <sup>‡</sup>                            | Space maintainer-removable-unilateral                                                                                                                                    |

eTable 3. Continued

| CODE                                       | PROCEDURE                                                                      |
|--------------------------------------------|--------------------------------------------------------------------------------|
| D1525 <sup>†</sup>                         | Space maintainer-removable-bilateral                                           |
| D1550 <sup>†</sup>                         | Re-cement or re-bond space maintainer                                          |
| D1555 <sup>†</sup>                         | Removal of fixed space maintainer                                              |
| D1575 <sup>†</sup>                         | Distal shoe space maintainer-fixed-unilateral                                  |
| D1999 <sup>†</sup>                         | Unspecified preventive procedure, by report                                    |
| <b>D2000-D2999 Restorative</b>             |                                                                                |
| Amalgam restorations (including polishing) |                                                                                |
| D2140 <sup>†</sup>                         | Amalgam-1 surface, primary or permanent                                        |
| D2150 <sup>†</sup>                         | Amalgam-2 surfaces, primary or permanent                                       |
| D2160 <sup>†</sup>                         | Amalgam-3 surfaces, primary or permanent                                       |
| D2161 <sup>†</sup>                         | Amalgam-4 or more surfaces, primary or permanent                               |
| Resin-based composite restorations-direct  |                                                                                |
| D2330 <sup>†</sup>                         | Resin-based composite-1 surface, anterior                                      |
| D2331 <sup>†</sup>                         | Resin-based composite-2 surfaces, anterior                                     |
| D2332 <sup>†</sup>                         | Resin-based composite-3 surfaces, anterior                                     |
| D2335 <sup>†</sup>                         | Resin-based composite-4 or more surfaces or involving incisal angle (anterior) |
| D2390 <sup>†</sup>                         | Resin-based composite crown, anterior                                          |
| D2391 <sup>†</sup>                         | Resin-based composite-1 surface, posterior                                     |
| D2392 <sup>†</sup>                         | Resin-based composite-2 surfaces, posterior                                    |
| D2393 <sup>†</sup>                         | Resin-based composite-3 surfaces, posterior                                    |
| D2394 <sup>†</sup>                         | Resin-based composite-4 or more surfaces, posterior                            |
| Gold foil restorations                     |                                                                                |
| D2410 <sup>†</sup>                         | Gold foil-1 surface                                                            |
| D2420 <sup>†</sup>                         | Gold foil-2 surfaces                                                           |
| D2430 <sup>†</sup>                         | Gold foil-3 surfaces                                                           |
| Inlay/onlay restorations <sup>§</sup>      |                                                                                |
| D2510 <sup>†</sup>                         | Inlay-metallic-1 surface                                                       |
| D2520 <sup>†</sup>                         | Inlay-metallic-2 surfaces                                                      |
| D2530 <sup>†</sup>                         | Inlay-metallic-3 or more surfaces                                              |
| D2542 <sup>†</sup>                         | Onlay-metallic-2 surfaces                                                      |
| D2543 <sup>†</sup>                         | Onlay-metallic-3 surfaces                                                      |
| D2544 <sup>†</sup>                         | Onlay-metallic-4 or more surfaces                                              |
| D2610 <sup>†</sup>                         | Inlay-porcelain/ceramic-1 surface                                              |
| D2620 <sup>†</sup>                         | Inlay-porcelain/ceramic-2 surfaces                                             |
| D2630 <sup>†</sup>                         | Inlay-porcelain/ceramic-3 or more surfaces                                     |
| D2642 <sup>†</sup>                         | Onlay-porcelain/ceramic-2 surfaces                                             |
| D2643 <sup>†</sup>                         | Onlay-porcelain/ceramic-3 surfaces                                             |
| D2644 <sup>†</sup>                         | Onlay-porcelain/ceramic-4 or more surfaces                                     |
| D2650 <sup>†</sup>                         | Inlay-resin-based composite <sup>‡</sup> -1 surface                            |
| D2651 <sup>†</sup>                         | Inlay-resin-based composite-2 surfaces                                         |
| D2652 <sup>†</sup>                         | Inlay-resin-based composite-3 or more surfaces                                 |
| D2662 <sup>†</sup>                         | Onlay-resin-based composite-2 surfaces                                         |

eTable 3. Continued

| CODE                            | PROCEDURE                                                                                          |
|---------------------------------|----------------------------------------------------------------------------------------------------|
| D2663 <sup>†</sup>              | Onlay-resin-based composite-3 surfaces                                                             |
| D2664 <sup>†</sup>              | Onlay-resin-based composite-4 or more surfaces                                                     |
| Crowns-single restorations only |                                                                                                    |
| D2710 <sup>†</sup>              | Crown-resin-based composite (indirect)                                                             |
| D2712 <sup>†</sup>              | Crown- <sup>3</sup> / <sub>4</sub> resin-based composite (indirect)                                |
| D2720 <sup>†</sup>              | Crown-resin with high noble metal                                                                  |
| D2721 <sup>†</sup>              | Crown-resin with predominantly base metal                                                          |
| D2722 <sup>†</sup>              | Crown-resin with noble metal                                                                       |
| D2740 <sup>†</sup>              | Crown-porcelain/ceramic substrate                                                                  |
| D2750 <sup>†</sup>              | Crown-porcelain fused to high noble metal                                                          |
| D2751 <sup>†</sup>              | Crown-porcelain fused to predominantly base metal                                                  |
| D2752 <sup>†</sup>              | Crown-porcelain fused to noble metal                                                               |
| D2780 <sup>†</sup>              | Crown-3/4 cast high noble metal                                                                    |
| D2781 <sup>†</sup>              | Crown-3/4 cast predominantly base metal                                                            |
| D2782 <sup>†</sup>              | Crown-3/4 cast noble metal                                                                         |
| D2783 <sup>†</sup>              | Crown-3/4 porcelain/ceramic                                                                        |
| D2790 <sup>†</sup>              | Crown-full cast high noble metal                                                                   |
| D2791 <sup>†</sup>              | Crown-full cast predominantly base metal                                                           |
| D2792 <sup>†</sup>              | Crown-full cast noble metal                                                                        |
| D2794 <sup>†</sup>              | Crown-titanium                                                                                     |
| D2799 <sup>†</sup>              | Provisional crown-further treatment or completion of diagnosis necessary prior to final impression |
| Other restorative services      |                                                                                                    |
| D2990 <sup>‡</sup>              | Resin infiltration of incipient smooth surface lesions                                             |
| D2910 <sup>‡</sup>              | Re-cement or re-bond inlay, onlay, veneer or partial coverage restoration                          |
| D2915 <sup>‡</sup>              | Re-cement or re-bond indirectly fabricated or prefabricated post and core                          |
| D2920 <sup>‡</sup>              | Re-cement or re-bond crown                                                                         |
| D2921 <sup>‡</sup>              | Reattachment of tooth fragment, incisal edge or cusp                                               |
| D2929 <sup>‡</sup>              | Prefabricated porcelain/ceramic crown-primary tooth                                                |
| D2930 <sup>‡</sup>              | Prefabricated stainless steel crown-primary tooth                                                  |
| D2931 <sup>‡</sup>              | Prefabricated stainless steel crown-permanent tooth                                                |
| D2932 <sup>‡</sup>              | Prefabricated resin crown                                                                          |
| D2933 <sup>‡</sup>              | Prefabricated stainless steel crown with resin window                                              |
| D2934 <sup>‡</sup>              | Prefabricated esthetic coated stainless steel crown-primary tooth                                  |
| D2940 <sup>‡</sup>              | Protective restoration                                                                             |
| D2941 <sup>‡</sup>              | Interim therapeutic restoration-primary dentition                                                  |
| D2949 <sup>‡</sup>              | Restorative foundation for an indirect restoration                                                 |
| D2950 <sup>‡</sup>              | Core buildup, including any pins when required                                                     |
| D2951 <sup>‡</sup>              | Pin retention-per tooth, in addition to restoration                                                |
| D2952 <sup>‡</sup>              | Post and core in addition to crown, indirectly fabricated                                          |
| D2953 <sup>‡</sup>              | Each additional indirectly fabricated post-same tooth                                              |
| D2954 <sup>‡</sup>              | Prefabricated post and core in addition to crown                                                   |
| D2957 <sup>‡</sup>              | Each additional prefabricated post-same tooth                                                      |
| D2955 <sup>‡</sup>              | Post removal                                                                                       |

**eTable 3.** Continued

| <b>CODE</b>                                                                           | <b>PROCEDURE</b>                                                                                                                                        |
|---------------------------------------------------------------------------------------|---------------------------------------------------------------------------------------------------------------------------------------------------------|
| D2960 <sup>†</sup>                                                                    | Labial veneer (resin laminate)-chairside                                                                                                                |
| D2961 <sup>†</sup>                                                                    | Labial veneer (resin laminate)-laboratory                                                                                                               |
| D2962 <sup>†</sup>                                                                    | Labial veneer (porcelain laminate)-laboratory                                                                                                           |
| D2971 <sup>†</sup>                                                                    | Additional procedures to construct new crown under existing partial denture framework                                                                   |
| D2975 <sup>†</sup>                                                                    | Coping                                                                                                                                                  |
| D2980 <sup>†</sup>                                                                    | Crown repair necessitated by restorative material failure                                                                                               |
| D2981 <sup>†</sup>                                                                    | Inlay repair necessitated by restorative material failure                                                                                               |
| D2982 <sup>†</sup>                                                                    | Onlay repair necessitated by restorative material failure                                                                                               |
| D2983 <sup>†</sup>                                                                    | Veneer repair necessitated by restorative material failure                                                                                              |
| D2999 <sup>†</sup>                                                                    | Unspecified restorative procedure, by report                                                                                                            |
| <b>D3000-D3999 Endodontics</b>                                                        |                                                                                                                                                         |
| Pulp capping                                                                          |                                                                                                                                                         |
| D3110 <sup>†</sup>                                                                    | Pulp cap-direct (excluding final restoration)                                                                                                           |
| D3120 <sup>†</sup>                                                                    | Pulp cap-indirect (excluding final restoration)                                                                                                         |
| Pulpotomy                                                                             |                                                                                                                                                         |
| D3220 <sup>†</sup>                                                                    | Therapeutic pulpotomy (excluding final restoration)-removal of pulp coronal to the dentinocemental junction and application of medicament               |
| D3221 <sup>*</sup>                                                                    | Pulpal debridement, primary and permanent teeth                                                                                                         |
| D3222 <sup>†</sup>                                                                    | Partial pulpotomy for apexogenesis-permanent tooth with incomplete root development                                                                     |
| Endodontic therapy on primary teeth                                                   |                                                                                                                                                         |
| D3230 <sup>†</sup>                                                                    | Pulpal therapy (resorbable filling)-anterior, primary tooth (excluding final restoration)                                                               |
| D3240 <sup>†</sup>                                                                    | Pulpal therapy (resorbable filling)-posterior, primary tooth (excluding final restoration)                                                              |
| Endodontic therapy (including treatment plan, clinical procedures and follow-up care) |                                                                                                                                                         |
| D3310 <sup>*</sup>                                                                    | Endodontic therapy, anterior tooth (excluding final restoration)                                                                                        |
| D3320 <sup>*</sup>                                                                    | Endodontic therapy, bicuspid tooth (excluding final restoration)                                                                                        |
| D3330 <sup>*</sup>                                                                    | Endodontic therapy, molar (excluding final restoration)                                                                                                 |
| D3331 <sup>†</sup>                                                                    | Treatment of root canal obstruction; nonsurgical access                                                                                                 |
| D3332 <sup>*</sup>                                                                    | Incomplete endodontic therapy; inoperable, unrestorable or fractured tooth                                                                              |
| D3333 <sup>*</sup>                                                                    | Internal root repair of perforation defects                                                                                                             |
| Endodontic retreatment                                                                |                                                                                                                                                         |
| D3346 <sup>*</sup>                                                                    | Retreatment of previous root canal therapy-anterior                                                                                                     |
| D3347 <sup>*</sup>                                                                    | Retreatment of previous root canal therapy-bicuspid                                                                                                     |
| D3348 <sup>*</sup>                                                                    | Retreatment of previous root canal therapy-molar                                                                                                        |
| Apexification/recalcification                                                         |                                                                                                                                                         |
| D3351 <sup>*</sup>                                                                    | Apexification/recalcification – initial visit (apical closure/calcific repair of perforations, root resorption, etc.)                                   |
| D3352 <sup>*</sup>                                                                    | Apexification/recalcification-interim medication replacement                                                                                            |
| D3353 <sup>*</sup>                                                                    | Apexification/recalcification-final visit (includes completed root canal therapy-apical closure/calcific repair of perforations, root resorption, etc.) |

eTable 3. Continued

| CODE                                                   | PROCEDURE                                                                                                                                  |
|--------------------------------------------------------|--------------------------------------------------------------------------------------------------------------------------------------------|
| Pulpal regeneration                                    |                                                                                                                                            |
| D3355 <sup>‡</sup>                                     | Pulpal regeneration-initial visit                                                                                                          |
| D3356 <sup>‡</sup>                                     | Pulpal regeneration-interim medication replacement                                                                                         |
| D3357 <sup>‡</sup>                                     | Pulpal regeneration-completion of treatment                                                                                                |
| Apicoectomy/periradicular services                     |                                                                                                                                            |
| D3410*                                                 | Apicoectomy-anterior                                                                                                                       |
| D3421*                                                 | Apicoectomy-bicuspid (first root)                                                                                                          |
| D3425*                                                 | Apicoectomy-molar (first root)                                                                                                             |
| D3426*                                                 | Apicoectomy (each additional root)                                                                                                         |
| D3427*                                                 | Periradicular surgery without apicoectomy                                                                                                  |
| D3428*                                                 | Bone graft in conjunction with periradicular surgery – per tooth, single site                                                              |
| D3429*                                                 | Bone graft in conjunction with periradicular surgery – each additional contiguous tooth in the same surgical site                          |
| D3430*                                                 | Retrograde filling-per root                                                                                                                |
| D3431*                                                 | Biologic materials to aid in soft and osseous tissue regeneration in conjunction with periradicular surgery                                |
| D3432*                                                 | Guided tissue regeneration, resorbable barrier, per site, in conjunction with periradicular surgery                                        |
| D3450*                                                 | Root amputation-per root                                                                                                                   |
| D3460*                                                 | Endodontic endosseous implant                                                                                                              |
| D3470*                                                 | Intentional re-implantation (including necessary splinting)                                                                                |
| Other endodontic procedures                            |                                                                                                                                            |
| D3910*                                                 | Surgical procedure for isolation of tooth with rubber dam                                                                                  |
| D3920*                                                 | Hemisection (including any root removal), not including root canal therapy                                                                 |
| D3950 <sup>‡</sup>                                     | Canal preparation and fitting of preformed dowel or post                                                                                   |
| D3999 <sup>‡</sup>                                     | Unspecified endodontic procedure, by report                                                                                                |
| <b>D4000-D4999 Periodontics</b>                        |                                                                                                                                            |
| Surgical services (including usual postoperative care) |                                                                                                                                            |
| D4210*                                                 | Gingivectomy or gingivoplasty-4 or more contiguous teeth or tooth bounded spaces per quadrant                                              |
| D4211*                                                 | Gingivectomy or gingivoplasty-1 to 3 contiguous teeth or tooth bounded spaces per quadrant                                                 |
| D4212*                                                 | Gingivectomy or gingivoplasty to allow access for restorative procedure, per tooth                                                         |
| D4230*                                                 | Anatomical crown exposure-4 or more contiguous teeth per quadrant                                                                          |
| D4231*                                                 | Anatomical crown exposure-1 to 3 teeth per quadrant                                                                                        |
| D4240*                                                 | Gingival flap procedure, including root planing-4 or more contiguous teeth or tooth bounded spaces per quadrant                            |
| D4241*                                                 | Gingival flap procedure, including root planing-1 to 3 contiguous teeth or tooth bounded spaces per quadrant                               |
| D4245*                                                 | Apically positioned flap                                                                                                                   |
| D4249*                                                 | Clinical crown lengthening-hard tissue                                                                                                     |
| D4260*                                                 | Osseous surgery (including elevation of a full thickness flap and closure)-4 or more contiguous teeth or tooth bounded spaces per quadrant |
| D4261*                                                 | Osseous surgery (including elevation of a full thickness flap and closure)-1 to 3 contiguous teeth or tooth bounded spaces per quadrant    |
| D4263*                                                 | Bone replacement graft-retained natural tooth-first site in quadrant                                                                       |

**eTable 3.** Continued

| <b>CODE</b>                                              | <b>PROCEDURE</b>                                                                                                                                                                        |
|----------------------------------------------------------|-----------------------------------------------------------------------------------------------------------------------------------------------------------------------------------------|
| D4264*                                                   | Bone replacement graft-retained natural tooth-each additional site in quadrant                                                                                                          |
| D4265*                                                   | Biologic materials to aid in soft and osseous tissue regeneration                                                                                                                       |
| D4266*                                                   | Guided tissue regeneration-resorbable barrier, per site                                                                                                                                 |
| D4267*                                                   | Guided tissue regeneration-nonresorbable barrier, per site (includes membrane removal)                                                                                                  |
| D4268*                                                   | Surgical revision procedure, per tooth                                                                                                                                                  |
| D4270*                                                   | Pedicle soft tissue graft procedure                                                                                                                                                     |
| D4273*                                                   | Autogenous connective tissue graft procedure (including donor and recipient surgical sites) first tooth, implant or edentulous tooth position in graft                                  |
| D4283*                                                   | Autogenous connective tissue graft procedure (including donor and recipient surgical sites)-each additional contiguous tooth, implant or edentulous tooth position in same graft site   |
| D4275*                                                   | Nonautogenous connective tissue graft (including recipient site and donor material) first tooth, implant, or edentulous tooth position in graft                                         |
| D4285*                                                   | Nonautogenous connective tissue graft (including recipient surgical site and donor material)-each additional contiguous tooth, implant, or edentulous tooth position in same graft site |
| D4274*                                                   | Mesial/distal wedge procedure, single tooth (when not performed in conjunction with surgical procedures in the same anatomical area)                                                    |
| D4276*                                                   | Combined connective tissue and double pedicle graft, per tooth                                                                                                                          |
| D4277*                                                   | Free soft tissue graft procedure (including recipient and donor surgical sites) first tooth, implant or edentulous tooth position in graft                                              |
| D4278*                                                   | Free soft tissue graft procedure (including recipient and donor surgical sites) each additional contiguous tooth, implant or edentulous tooth position in same graft site               |
| nonsurgical periodontal service                          |                                                                                                                                                                                         |
| D4320 <sup>†</sup>                                       | Provisional splinting-intracoronal                                                                                                                                                      |
| D4321 <sup>†</sup>                                       | Provisional splinting-extracoronal                                                                                                                                                      |
| D4341*                                                   | Periodontal scaling and root planing-4 or more teeth per quadrant                                                                                                                       |
| D4342*                                                   | Periodontal scaling and root planing-1 to 3 teeth per quadrant                                                                                                                          |
| D4346*                                                   | Scaling in the presence of generalized moderate or severe gingival inflammation-full mouth, after oral evaluation                                                                       |
| D4355*                                                   | Full mouth debridement to enable comprehensive evaluation and diagnosis                                                                                                                 |
| D4381*                                                   | Localized delivery of antimicrobial agents via controlled release vehicle into diseased crevicular tissue, per tooth                                                                    |
| Other periodontal services                               |                                                                                                                                                                                         |
| D4910*                                                   | Periodontal maintenance                                                                                                                                                                 |
| D4920 <sup>†</sup>                                       | Unscheduled dressing change (by someone other than treating dentist or their staff)                                                                                                     |
| D4921*                                                   | Gingival irrigation — per quadrant                                                                                                                                                      |
| D4999 <sup>†</sup>                                       | Unspecified periodontal procedure, by report                                                                                                                                            |
| <b>D5000-D5899 Prosthodontics (Removable)</b>            |                                                                                                                                                                                         |
| Complete dentures (including routine post-delivery care) |                                                                                                                                                                                         |
| D5110 <sup>†</sup>                                       | Complete denture-maxillary                                                                                                                                                              |
| D5120 <sup>†</sup>                                       | Complete denture-mandibular                                                                                                                                                             |
| D5130 <sup>†</sup>                                       | Immediate denture-maxillary                                                                                                                                                             |
| D5140 <sup>†</sup>                                       | Immediate denture-mandibular                                                                                                                                                            |

eTable 3. Continued

| CODE                                                    | PROCEDURE                                                                                                                               |
|---------------------------------------------------------|-----------------------------------------------------------------------------------------------------------------------------------------|
| Partial dentures (including routine post-delivery care) |                                                                                                                                         |
| D5211 <sup>‡</sup>                                      | Maxillary partial denture-resin base (including any conventional clasps, rests and teeth)                                               |
| D5212 <sup>‡</sup>                                      | Mandibular partial denture-resin base (including any conventional clasps, rests and teeth)                                              |
| D5213 <sup>‡</sup>                                      | Maxillary partial denture-cast metal framework with resin denture bases (including any conventional clasps, rests and teeth)            |
| D5214 <sup>‡</sup>                                      | Mandibular partial denture-cast metal framework with resin denture bases (including any conventional clasps, rests and teeth)           |
| D5221 <sup>‡</sup>                                      | Immediate maxillary partial denture-resin base (including any conventional clasps, rests and teeth)                                     |
| D5222 <sup>‡</sup>                                      | Immediate mandibular partial denture-resin base (including any conventional clasps, rests and teeth)                                    |
| D5223 <sup>‡</sup>                                      | Immediate maxillary partial denture-cast metal framework with resin denture bases (including any conventional clasps, rests and teeth)  |
| D5224 <sup>‡</sup>                                      | Immediate mandibular partial denture-cast metal framework with resin denture bases (including any conventional clasps, rests and teeth) |
| D5225 <sup>‡</sup>                                      | Maxillary partial denture-flexible base (including any clasps, rests and teeth)                                                         |
| D5226 <sup>‡</sup>                                      | Mandibular partial denture-flexible base (including any clasps, rests and teeth)                                                        |
| D5281 <sup>‡</sup>                                      | Removable unilateral partial denture-1 piece cast metal (including clasps and teeth)                                                    |
| Adjustments to dentures                                 |                                                                                                                                         |
| D5410 <sup>‡</sup>                                      | Adjust complete denture-maxillary                                                                                                       |
| D5411 <sup>‡</sup>                                      | Adjust complete denture-mandibular                                                                                                      |
| D5421 <sup>‡</sup>                                      | Adjust partial denture-maxillary                                                                                                        |
| D5422 <sup>‡</sup>                                      | Adjust partial denture-mandibular                                                                                                       |
| Repairs to complete dentures                            |                                                                                                                                         |
| D5510 <sup>‡</sup>                                      | Repair broken complete denture base                                                                                                     |
| D5520 <sup>‡</sup>                                      | Replace missing or broken teeth-complete denture (each tooth)                                                                           |
| Repairs to partial dentures                             |                                                                                                                                         |
| D5610 <sup>‡</sup>                                      | Repair resin denture base                                                                                                               |
| D5620 <sup>‡</sup>                                      | Repair cast framework                                                                                                                   |
| D5630 <sup>‡</sup>                                      | Repair or replace broken clasp-per tooth                                                                                                |
| D5640 <sup>‡</sup>                                      | Replace broken teeth-per tooth                                                                                                          |
| D5650 <sup>‡</sup>                                      | Add tooth to existing partial denture                                                                                                   |
| D5660 <sup>‡</sup>                                      | Add clasp to existing partial denture-per tooth                                                                                         |
| D5670 <sup>‡</sup>                                      | Replace all teeth and acrylic on cast metal framework (maxillary)                                                                       |
| D5671 <sup>‡</sup>                                      | Replace all teeth and acrylic on cast metal framework (mandibular)                                                                      |
| Denture rebase procedures                               |                                                                                                                                         |
| D5710 <sup>‡</sup>                                      | Rebase complete maxillary denture                                                                                                       |
| D5711 <sup>‡</sup>                                      | Rebase complete mandibular denture                                                                                                      |
| D5720 <sup>‡</sup>                                      | Rebase maxillary partial denture                                                                                                        |
| D5721 <sup>‡</sup>                                      | Rebase mandibular partial denture                                                                                                       |
| Denture relining procedures                             |                                                                                                                                         |
| D5730 <sup>‡</sup>                                      | Reline complete maxillary denture (chairside)                                                                                           |
| D5731 <sup>‡</sup>                                      | Reline complete mandibular denture (chairside)                                                                                          |
| D5740 <sup>‡</sup>                                      | Reline maxillary partial denture (chairside)                                                                                            |



**eTable 3.** Continued

| <b>CODE</b>                                              | <b>PROCEDURE</b>                                                                                                         |
|----------------------------------------------------------|--------------------------------------------------------------------------------------------------------------------------|
| D5741 <sup>†</sup>                                       | Reline mandibular partial denture (chairside)                                                                            |
| D5750 <sup>†</sup>                                       | Reline complete maxillary denture (laboratory)                                                                           |
| D5751 <sup>†</sup>                                       | Reline complete mandibular denture (laboratory)                                                                          |
| D5760 <sup>†</sup>                                       | Reline maxillary partial denture (laboratory)                                                                            |
| D5761 <sup>†</sup>                                       | Reline mandibular partial denture (laboratory)                                                                           |
| Interim prosthesis                                       |                                                                                                                          |
| D5810 <sup>†</sup>                                       | Interim complete denture (maxillary)                                                                                     |
| D5811 <sup>†</sup>                                       | Interim complete denture (mandibular)                                                                                    |
| D5820 <sup>†</sup>                                       | Interim partial denture (maxillary)                                                                                      |
| D5821 <sup>†</sup>                                       | Interim partial denture (mandibular)                                                                                     |
| Other removable prosthetic services                      |                                                                                                                          |
| D5850 <sup>†</sup>                                       | Tissue conditioning, maxillary                                                                                           |
| D5851 <sup>†</sup>                                       | Tissue conditioning, mandibular                                                                                          |
| D5862 <sup>†</sup>                                       | Precision attachment, by report                                                                                          |
| D5863 <sup>†</sup>                                       | Overdenture-complete maxillary                                                                                           |
| D5864 <sup>†</sup>                                       | Overdenture-partial maxillary                                                                                            |
| D5865 <sup>†</sup>                                       | Overdenture-complete mandibular                                                                                          |
| D5866 <sup>†</sup>                                       | Overdenture-partial mandibular                                                                                           |
| D5867 <sup>†</sup>                                       | Replacement of replaceable part of semi-precision or precision attachment (male or female component)                     |
| D5875 <sup>†</sup>                                       | Modification of removable prosthesis following implant surgery                                                           |
| D5899 <sup>†</sup>                                       | Unspecified removable prosthodontic procedure, by report                                                                 |
| <b>D5900-D5999 Maxillofacial Prosthetics<sup>†</sup></b> |                                                                                                                          |
| D5992 <sup>†</sup>                                       | Adjust maxillofacial prosthetic appliance, by report                                                                     |
| D5993 <sup>†</sup>                                       | Maintenance and cleaning of a maxillofacial prosthesis (extra- or intra-oral) other than required adjustments, by report |
| D5914 <sup>†</sup>                                       | Auricular prosthesis                                                                                                     |
| D5927 <sup>†</sup>                                       | Auricular prosthesis, replacement                                                                                        |
| D5987 <sup>†</sup>                                       | Commissure splint                                                                                                        |
| D5924 <sup>†</sup>                                       | Cranial prosthesis                                                                                                       |
| D5925 <sup>†</sup>                                       | Facial augmentation implant prosthesis                                                                                   |
| D5912 <sup>†</sup>                                       | Facial moulage (complete)                                                                                                |
| D5911 <sup>†</sup>                                       | Facial moulage (sectional)                                                                                               |
| D5919 <sup>†</sup>                                       | Facial prosthesis                                                                                                        |
| D5929 <sup>†</sup>                                       | Facial prosthesis, replacement                                                                                           |
| D5951 <sup>†</sup>                                       | Feeding aid                                                                                                              |
| D5934 <sup>†</sup>                                       | Mandibular resection prosthesis with guide flange                                                                        |
| D5935 <sup>†</sup>                                       | Mandibular resection prosthesis without guide flange                                                                     |
| D5913 <sup>†</sup>                                       | Nasal prosthesis                                                                                                         |
| D5926 <sup>†</sup>                                       | Nasal prosthesis, replacement                                                                                            |
| D5922 <sup>†</sup>                                       | Nasal septal prosthesis                                                                                                  |
| D5932 <sup>†</sup>                                       | Obturator prosthesis, definitive                                                                                         |
| D5936 <sup>†</sup>                                       | Obturator prosthesis, interim                                                                                            |
| D5933 <sup>†</sup>                                       | Obturator prosthesis, modification                                                                                       |

eTable 3. Continued

| CODE                                | PROCEDURE                                                                                                                                                                                           |
|-------------------------------------|-----------------------------------------------------------------------------------------------------------------------------------------------------------------------------------------------------|
| D5931 <sup>‡</sup>                  | Obturator prosthesis, surgical                                                                                                                                                                      |
| D5916 <sup>‡</sup>                  | Ocular prosthesis                                                                                                                                                                                   |
| D5923 <sup>‡</sup>                  | Ocular prosthesis, interim                                                                                                                                                                          |
| D5915 <sup>‡</sup>                  | Orbital prosthesis                                                                                                                                                                                  |
| D5928 <sup>‡</sup>                  | Orbital prosthesis, replacement                                                                                                                                                                     |
| D5954 <sup>‡</sup>                  | Palatal augmentation prosthesis                                                                                                                                                                     |
| D5955 <sup>‡</sup>                  | Palatal lift prosthesis, definitive                                                                                                                                                                 |
| D5958 <sup>‡</sup>                  | Palatal lift prosthesis, interim                                                                                                                                                                    |
| D5959 <sup>‡</sup>                  | Palatal lift prosthesis, modification                                                                                                                                                               |
| D5985 <sup>‡</sup>                  | Radiation cone locator                                                                                                                                                                              |
| D5984 <sup>‡</sup>                  | Radiation shield                                                                                                                                                                                    |
| D5953 <sup>‡</sup>                  | Speech aid prosthesis, adult                                                                                                                                                                        |
| D5960 <sup>‡</sup>                  | Speech aid prosthesis, modification                                                                                                                                                                 |
| D5952 <sup>‡</sup>                  | Speech aid prosthesis, pediatric                                                                                                                                                                    |
| D5988 <sup>‡</sup>                  | Surgical splint                                                                                                                                                                                     |
| D5982 <sup>‡</sup>                  | Surgical stent                                                                                                                                                                                      |
| D5937 <sup>‡</sup>                  | Trismus appliance (not for temporomandibular disorder [TMD] treatment)                                                                                                                              |
| Carriers                            |                                                                                                                                                                                                     |
| D5986 <sup>‡</sup>                  | Fluoride gel carrier                                                                                                                                                                                |
| D5994 <sup>‡</sup>                  | Periodontal medicament carrier with peripheral seal – laboratory processed                                                                                                                          |
| D5983 <sup>‡</sup>                  | Radiation carrier                                                                                                                                                                                   |
| D5991 <sup>‡</sup>                  | Vesiculobullous disease medicament carrier                                                                                                                                                          |
| D5999 <sup>‡</sup>                  | Unspecified maxillofacial prosthesis, by report                                                                                                                                                     |
| <b>D6000-D6199 Implant Services</b> |                                                                                                                                                                                                     |
| Presurgical services                |                                                                                                                                                                                                     |
| D6190 <sup>‡</sup>                  | Radiographic/surgical implant index, by report                                                                                                                                                      |
| Surgical services                   |                                                                                                                                                                                                     |
| D6010*                              | Surgical placement of implant body: endosteal implant                                                                                                                                               |
| D6011*                              | Second stage implant surgery                                                                                                                                                                        |
| D6012*                              | Surgical placement of interim implant body for transitional prosthesis: endosteal implant                                                                                                           |
| D6013*                              | Surgical placement of mini implant                                                                                                                                                                  |
| D6040*                              | Surgical placement: eosteal implant                                                                                                                                                                 |
| D6050*                              | Surgical placement: transosteal implant                                                                                                                                                             |
| D6100*                              | Implant removal, by report                                                                                                                                                                          |
| D6101*                              | Debridement of a peri-implant defect or defects surrounding a single implant, and surface cleaning of the exposed implant surfaces, including flap entry and closure                                |
| D6102*                              | Debridement and osseous contouring of a peri-implant defect or defects surrounding a single implant and includes surface cleaning of the exposed implant surfaces, including flap entry and closure |
| D6103*                              | Bone graft for repair of peri-implant defect – does not include flap entry and closure                                                                                                              |
| D6104*                              | Bone graft at time of implant placement                                                                                                                                                             |

**eTable 3.** Continued

| CODE                                               | PROCEDURE                                                                                     |
|----------------------------------------------------|-----------------------------------------------------------------------------------------------|
| Implant-supported prosthetics                      |                                                                                               |
| Supporting structures                              |                                                                                               |
| D6055 <sup>†</sup>                                 | Connecting bar-implant supported or abutment supported                                        |
| D6056 <sup>†</sup>                                 | Prefabricated abutment-includes modification and placement                                    |
| D6057 <sup>†</sup>                                 | Custom fabricated abutment-includes placement                                                 |
| D6051 <sup>†</sup>                                 | Interim abutment                                                                              |
| D6052 <sup>†</sup>                                 | Semi-precision attachment abutment                                                            |
| Implant/abutment supported removable dentures      |                                                                                               |
| D6110 <sup>‡</sup>                                 | Implant/abutment supported removable denture for edentulous arch-maxillary                    |
| D6111 <sup>‡</sup>                                 | Implant/abutment supported removable denture for edentulous arch-mandibular                   |
| D6112 <sup>‡</sup>                                 | Implant/abutment supported removable denture for partially edentulous arch-maxillary          |
| D6113 <sup>‡</sup>                                 | Implant/abutment supported removable denture for partially edentulous arch-mandibular         |
| Implant/abutment supported fixed dentures (hybrid) |                                                                                               |
| D6114 <sup>‡</sup>                                 | Implant/abutment supported fixed denture for edentulous arch-maxillary                        |
| D6115 <sup>‡</sup>                                 | Implant/abutment supported fixed denture for edentulous arch-mandibular                       |
| D6116 <sup>‡</sup>                                 | Implant/abutment supported fixed denture for partially edentulous arch-maxillary              |
| D6117 <sup>‡</sup>                                 | Implant/abutment supported fixed denture for partially edentulous arch-mandibular             |
| Single crowns, abutment supported                  |                                                                                               |
| D6058 <sup>‡</sup>                                 | Abutment supported porcelain/ceramic crown                                                    |
| D6059 <sup>‡</sup>                                 | Abutment supported porcelain fused to metal crown (high noble metal)                          |
| D6060 <sup>‡</sup>                                 | Abutment supported porcelain fused to metal crown (predominantly base metal)                  |
| D6061 <sup>‡</sup>                                 | Abutment supported porcelain fused to metal crown (noble metal)                               |
| D6062 <sup>‡</sup>                                 | Abutment supported cast metal crown (high noble metal)                                        |
| D6063 <sup>‡</sup>                                 | Abutment supported cast metal crown (predominantly base metal)                                |
| D6064 <sup>‡</sup>                                 | Abutment supported cast metal crown (noble metal)                                             |
| D6094 <sup>‡</sup>                                 | Abutment supported crown (titanium)                                                           |
| Single crowns, implant supported                   |                                                                                               |
| D6065 <sup>†</sup>                                 | Implant supported porcelain/ceramic crown                                                     |
| D6066 <sup>†</sup>                                 | Implant supported porcelain fused to metal crown (titanium, titanium alloy, high noble metal) |
| D6067 <sup>†</sup>                                 | Implant supported metal crown (titanium, titanium alloy, high noble metal)                    |
| Fixed partial denture (FPD), abutment supported    |                                                                                               |
| D6068 <sup>‡</sup>                                 | Abutment supported retainer for porcelain/ceramic FPD                                         |
| D6069 <sup>‡</sup>                                 | Abutment supported retainer for porcelain fused to metal FPD (high noble metal)               |
| D6070 <sup>‡</sup>                                 | Abutment supported retainer for porcelain fused to metal FPD (predominantly base metal)       |
| D6071 <sup>‡</sup>                                 | Abutment supported retainer for porcelain fused to metal FPD (noble metal)                    |
| D6072 <sup>‡</sup>                                 | Abutment supported retainer for cast metal FPD (high noble metal)                             |
| D6073 <sup>‡</sup>                                 | Abutment supported retainer for cast metal FPD (predominantly base metal)                     |

eTable 3. Continued

| CODE                                          | PROCEDURE                                                                                                                                                            |
|-----------------------------------------------|----------------------------------------------------------------------------------------------------------------------------------------------------------------------|
| D6074 <sup>‡</sup>                            | Abutment supported retainer for cast metal FPD (noble metal)                                                                                                         |
| D6194 <sup>‡</sup>                            | Abutment supported retainer crown for FPD (titanium)                                                                                                                 |
| Fixed partial denture, implant supported      |                                                                                                                                                                      |
| D6075 <sup>‡</sup>                            | Implant supported retainer for ceramic FPD                                                                                                                           |
| D6076 <sup>‡</sup>                            | Implant supported retainer for porcelain fused to metal FPD (titanium, titanium alloy, or high noble metal)                                                          |
| D6077 <sup>‡</sup>                            | Implant supported retainer for cast metal FPD (titanium, titanium alloy, or high noble metal)                                                                        |
| Other implant services                        |                                                                                                                                                                      |
| D6080 <sup>*</sup>                            | Implant maintenance procedures when prostheses are removed and reinserted, including cleansing of prostheses and abutments                                           |
| D6081 <sup>*</sup>                            | Scaling and debridement in the presence of inflammation or mucositis of a single implant, including cleaning of the implant surfaces, without flap entry and closure |
| D6085 <sup>‡</sup>                            | Provisional implant crown                                                                                                                                            |
| D6090 <sup>‡</sup>                            | Repair implant supported prosthesis, by report                                                                                                                       |
| D6095 <sup>‡</sup>                            | Repair implant abutment, by report                                                                                                                                   |
| D6091 <sup>‡</sup>                            | Replacement of semi-precision or precision attachment (male or female component) of implant/abutment supported prosthesis, per attachment                            |
| D6092 <sup>‡</sup>                            | Re-cement or re-bond implant/abutment supported crown                                                                                                                |
| D6093 <sup>‡</sup>                            | Re-cement or re-bond implant/abutment supported fixed partial denture                                                                                                |
| D6199 <sup>‡</sup>                            | Unspecified implant procedure, by report                                                                                                                             |
| <b>D6200-D6999 Prosthodontics (Fixed)</b>     |                                                                                                                                                                      |
| Fixed partial denture pontics                 |                                                                                                                                                                      |
| D6205 <sup>‡</sup>                            | Pontic-indirect resin based composite                                                                                                                                |
| D6210 <sup>‡</sup>                            | Pontic-cast high noble metal                                                                                                                                         |
| D6211 <sup>‡</sup>                            | Pontic-cast predominantly base metal                                                                                                                                 |
| D6212 <sup>‡</sup>                            | Pontic-cast noble metal                                                                                                                                              |
| D6214 <sup>‡</sup>                            | Pontic-titanium                                                                                                                                                      |
| D6240 <sup>‡</sup>                            | Pontic-porcelain fused to high noble metal                                                                                                                           |
| D6241 <sup>‡</sup>                            | Pontic-porcelain fused to predominantly base metal                                                                                                                   |
| D6242 <sup>‡</sup>                            | Pontic-porcelain fused to noble metal                                                                                                                                |
| D6245 <sup>‡</sup>                            | Pontic-porcelain/ceramic                                                                                                                                             |
| D6250 <sup>‡</sup>                            | Pontic-resin with high noble metal                                                                                                                                   |
| D6251 <sup>‡</sup>                            | Pontic-resin with predominantly base metal                                                                                                                           |
| D6252 <sup>‡</sup>                            | Pontic-resin with noble metal                                                                                                                                        |
| D6253 <sup>‡</sup>                            | Provisional pontic-further treatment or completion of diagnosis necessary prior to final impression                                                                  |
| Fixed partial denture retainers-inlays/onlays |                                                                                                                                                                      |
| D6545 <sup>‡</sup>                            | Retainer-cast metal for resin bonded fixed prosthesis                                                                                                                |
| D6548 <sup>‡</sup>                            | Retainer-porcelain/ceramic for resin bonded fixed prosthesis                                                                                                         |
| D6549 <sup>‡</sup>                            | Resin retainer-for resin bonded fixed prosthesis                                                                                                                     |
| D6600 <sup>‡</sup>                            | Retainer inlay-porcelain/ceramic, 2 surfaces                                                                                                                         |
| D6601 <sup>‡</sup>                            | Retainer inlay-porcelain/ceramic, 3 or more surfaces                                                                                                                 |
| D6602 <sup>‡</sup>                            | Retainer inlay-cast high noble metal, 2 surfaces                                                                                                                     |
| D6603 <sup>‡</sup>                            | Retainer inlay-cast high noble metal, 3 or more surfaces                                                                                                             |

**eTable 3.** Continued

| <b>CODE</b>                                                                                  | <b>PROCEDURE</b>                                                                                            |
|----------------------------------------------------------------------------------------------|-------------------------------------------------------------------------------------------------------------|
| D6604 <sup>†</sup>                                                                           | Retainer inlay-cast predominantly base metal, 2 surfaces                                                    |
| D6605 <sup>†</sup>                                                                           | Retainer inlay-cast predominantly base metal, 3 or more surfaces                                            |
| D6606 <sup>†</sup>                                                                           | Retainer inlay-cast noble metal, 2 surfaces                                                                 |
| D6607 <sup>†</sup>                                                                           | Retainer inlay-cast noble metal, 3 or more surfaces                                                         |
| D6624 <sup>†</sup>                                                                           | Retainer inlay-titanium                                                                                     |
| D6608 <sup>†</sup>                                                                           | Retainer onlay-porcelain/ceramic, 2 surfaces                                                                |
| D6609 <sup>†</sup>                                                                           | Retainer onlay-porcelain/ceramic, 3 or more surfaces                                                        |
| D6610 <sup>†</sup>                                                                           | Retainer onlay-cast high noble metal, 2 surfaces                                                            |
| D6611 <sup>†</sup>                                                                           | Retainer onlay-cast high noble metal, 3 or more surfaces                                                    |
| D6612 <sup>†</sup>                                                                           | Retainer onlay-cast predominantly base metal, 2 surfaces                                                    |
| D6613 <sup>†</sup>                                                                           | Retainer onlay-cast predominantly base metal, 3 or more surfaces                                            |
| D6614 <sup>†</sup>                                                                           | Retainer onlay-cast noble metal, 2 surfaces                                                                 |
| D6615 <sup>†</sup>                                                                           | Retainer onlay-cast noble metal, 3 or more surfaces                                                         |
| D6634 <sup>†</sup>                                                                           | Retainer onlay-titanium                                                                                     |
| Fixed partial denture retainers-crowns                                                       |                                                                                                             |
| D6710 <sup>†</sup>                                                                           | Retainer crown-indirect resin based composite                                                               |
| D6720 <sup>†</sup>                                                                           | Retainer crown-resin with high noble metal                                                                  |
| D6721 <sup>†</sup>                                                                           | Retainer crown-resin with predominantly base metal                                                          |
| D6722 <sup>†</sup>                                                                           | Retainer crown-resin with noble metal                                                                       |
| D6740 <sup>†</sup>                                                                           | Retainer crown-porcelain/ceramic                                                                            |
| D6750 <sup>†</sup>                                                                           | Retainer crown-porcelain fused to high noble metal                                                          |
| D6751 <sup>†</sup>                                                                           | Retainer crown-porcelain fused to predominantly base metal                                                  |
| D6752 <sup>†</sup>                                                                           | Retainer crown-porcelain fused to noble metal                                                               |
| D6780 <sup>†</sup>                                                                           | Retainer crown-3/4 cast high noble metal                                                                    |
| D6781 <sup>†</sup>                                                                           | Retainer crown-3/4 cast predominantly base metal                                                            |
| D6782 <sup>†</sup>                                                                           | Retainer crown-3/4 cast noble metal                                                                         |
| D6783 <sup>†</sup>                                                                           | Retainer crown-3/4 porcelain/ceramic                                                                        |
| D6790 <sup>†</sup>                                                                           | Retainer crown-full cast high noble metal                                                                   |
| D6791 <sup>†</sup>                                                                           | Retainer crown-full cast predominantly base metal                                                           |
| D6792 <sup>†</sup>                                                                           | Retainer crown-full cast noble metal                                                                        |
| D6794 <sup>†</sup>                                                                           | Retainer crown-titanium                                                                                     |
| D6793 <sup>†</sup>                                                                           | Provisional retainer crown-further treatment or completion of diagnosis necessary prior to final impression |
| Other fixed partial denture services                                                         |                                                                                                             |
| D6920 <sup>†</sup>                                                                           | Connector bar                                                                                               |
| D6930 <sup>†</sup>                                                                           | Re-cement or re-bond fixed partial denture                                                                  |
| D6940 <sup>†</sup>                                                                           | Stress breaker                                                                                              |
| D6950 <sup>†</sup>                                                                           | Precision attachment                                                                                        |
| D6980 <sup>†</sup>                                                                           | Fixed partial denture repair necessitated by restorative material failure                                   |
| D6985 <sup>†</sup>                                                                           | Pediatric partial denture, fixed                                                                            |
| D6999 <sup>†</sup>                                                                           | Unspecified fixed prosthodontic procedure, by report                                                        |
| <b>D7000-D7999 Oral and Maxillofacial Surgery</b>                                            |                                                                                                             |
| Extractions (includes local anesthesia, suturing, if needed, and routine postoperative care) |                                                                                                             |
| D7111*                                                                                       | Extraction, coronal remnants-deciduous tooth                                                                |

eTable 3. Continued

| CODE                             | PROCEDURE                                                                                                                                                                       |
|----------------------------------|---------------------------------------------------------------------------------------------------------------------------------------------------------------------------------|
| D7140*                           | Extraction, erupted tooth or exposed root (elevation and/or forceps removal)                                                                                                    |
| D7210*                           | Extraction, erupted tooth requiring removal of bone and/or sectioning of tooth, and including elevation of mucoperiosteal flap if indicated                                     |
| D7220*                           | Removal of impacted tooth-soft tissue                                                                                                                                           |
| D7230*                           | Removal of impacted tooth-partially bony                                                                                                                                        |
| D7240*                           | Removal of impacted tooth-completely bony                                                                                                                                       |
| D7241*                           | Removal of impacted tooth-completely bony, with unusual surgical complications                                                                                                  |
| D7250*                           | Removal of residual tooth roots (cutting procedure)                                                                                                                             |
| D7251*                           | Coronectomy – intentional partial tooth removal                                                                                                                                 |
| Other surgical procedures        |                                                                                                                                                                                 |
| D7260*                           | Oroantral fistula closure                                                                                                                                                       |
| D7261*                           | Primary closure of a sinus perforation                                                                                                                                          |
| D7270*                           | Tooth reimplantation and/or stabilization of accidentally evulsed or displaced tooth                                                                                            |
| D7272*                           | Tooth transplantation (includes re-implantation from 1 site to another and splinting and/or stabilization)                                                                      |
| D7280*                           | Exposure of an unerupted tooth                                                                                                                                                  |
| D7282*                           | Mobilization of erupted or malpositioned tooth to aid eruption                                                                                                                  |
| D7283*                           | Placement of device to facilitate eruption of impacted tooth                                                                                                                    |
| D7285*                           | Incisional biopsy of oral tissue-hard (bone, tooth)                                                                                                                             |
| D7286*                           | Incisional biopsy of oral tissue-soft                                                                                                                                           |
| D7287 <sup>‡</sup>               | Exfoliative cytological sample collection                                                                                                                                       |
| D7288 <sup>‡</sup>               | Brush biopsy-transepithelial sample collection                                                                                                                                  |
| D7290*                           | Surgical repositioning of teeth                                                                                                                                                 |
| D7291*                           | Transseptal fibrotomy/supra crestal fibrotomy, by report                                                                                                                        |
| D7292*                           | Placement of temporary anchorage device [screw retained plate] requiring flap; includes device removal                                                                          |
| D7293*                           | Placement of temporary anchorage device requiring flap; includes device removal                                                                                                 |
| D7294*                           | Placement of temporary anchorage device without flap; includes device removal                                                                                                   |
| D7295*                           | Harvest of bone for use in autogenous grafting procedure                                                                                                                        |
| Alveoplasty-preparation of ridge |                                                                                                                                                                                 |
| D7310*                           | Alveoplasty in conjunction with extractions-4 or more teeth or tooth spaces, per quadrant                                                                                       |
| D7311*                           | Alveoplasty in conjunction with extractions -1 to 3 teeth or tooth spaces, per quadrant                                                                                         |
| D7320*                           | Alveoplasty not in conjunction with extractions-4 or more teeth or tooth spaces, per quadrant                                                                                   |
| D7321*                           | Alveoplasty not in conjunction with extractions -1 to 3 teeth or tooth spaces, per quadrant                                                                                     |
| Vestibuloplasty                  |                                                                                                                                                                                 |
| D7340*                           | Vestibuloplasty-ridge extension (secondary epithelialization)                                                                                                                   |
| D7350*                           | Vestibuloplasty-ridge extension (including soft tissue grafts, muscle reattachment, revision of soft tissue attachment and management of hypertrophied and hyperplastic tissue) |
| Excision of soft tissue lesions  |                                                                                                                                                                                 |
| D7410*                           | Excision of benign lesion up to 1.25 cm                                                                                                                                         |

**eTable 3.** Continued

| <b>CODE</b>                       | <b>PROCEDURE</b>                                                                                                  |
|-----------------------------------|-------------------------------------------------------------------------------------------------------------------|
| D7411*                            | Excision of benign lesion greater than 1.25 cm                                                                    |
| D7412*                            | Excision of benign lesion, complicated                                                                            |
| D7413*                            | Excision of malignant lesion up to 1.25 cm                                                                        |
| D7414*                            | Excision of malignant lesion greater than 1.25 cm                                                                 |
| D7415*                            | Excision of malignant lesion, complicated                                                                         |
| D7465*                            | Destruction of lesion(s) by physical or chemical method, by report                                                |
| Excision of intra-osseous lesions |                                                                                                                   |
| D7440*                            | Excision of malignant tumor-lesion diameter up to 1.25 cm                                                         |
| D7441*                            | Excision of malignant tumor-lesion diameter greater than 1.25 cm                                                  |
| D7450*                            | Removal of benign odontogenic cyst or tumor-lesion diameter up to 1.25 cm                                         |
| D7451*                            | Removal of benign odontogenic cyst or tumor-lesion diameter greater than 1.25 cm                                  |
| D7460*                            | Removal of benign nonodontogenic cyst or tumor-lesion diameter up to 1.25 cm                                      |
| D7461*                            | Removal of benign nonodontogenic cyst or tumor-lesion diameter greater than 1.25 cm                               |
| Excision of bone tissue           |                                                                                                                   |
| D7471*                            | Removal of lateral exostosis (maxilla or mandible)                                                                |
| D7472*                            | Removal of torus palatinus                                                                                        |
| D7473*                            | Removal of torus mandibularis                                                                                     |
| D7485*                            | Reduction of osseous tuberosity                                                                                   |
| D7490*                            | Radical resection of maxilla or mandible                                                                          |
| Surgical incision                 |                                                                                                                   |
| D7510*                            | Incision and drainage of abscess-intraoral soft tissue                                                            |
| D7511*                            | Incision and drainage of abscess-intraoral soft tissue-complicated (includes drainage of multiple fascial spaces) |
| D7520*                            | Incision and drainage of abscess-extraoral soft tissue                                                            |
| D7521*                            | Incision and drainage of abscess-extraoral soft tissue-complicated (includes drainage of multiple fascial spaces) |
| D7530*                            | Removal of foreign body from mucosa, skin, or subcutaneous alveolar tissue                                        |
| D7540*                            | Removal of reaction producing foreign bodies, musculoskeletal system                                              |
| D7550*                            | Partial ostectomy/sequestrectomy for removal of vital bone                                                        |
| D7560*                            | Maxillary sinusotomy for removal of tooth fragment or foreign body                                                |
| Treatment of closed fractures     |                                                                                                                   |
| D7610*                            | Maxilla-open reduction (teeth immobilized, if present)                                                            |
| D7620 <sup>†</sup>                | Maxilla-closed reduction (teeth immobilized, if present)                                                          |
| D7630*                            | Mandible-open reduction (teeth immobilized, if present)                                                           |
| D7640 <sup>†</sup>                | Mandible-closed reduction (teeth immobilized, if present)                                                         |
| D7650 <sup>†</sup>                | Malar and/or zygomatic arch-open reduction                                                                        |
| D7660 <sup>†</sup>                | Malar and/or zygomatic arch-closed reduction                                                                      |
| D7670 <sup>†</sup>                | Alveolus-closed reduction, may include stabilization of teeth                                                     |
| D7671*                            | Alveolus-open reduction, may include stabilization of teeth                                                       |
| D7680 <sup>†</sup>                | Facial bones-complicated reduction with fixation and multiple surgical approaches                                 |
| Treatment of open fractures       |                                                                                                                   |
| D7710*                            | Maxilla-open reduction                                                                                            |

eTable 3. Continued

| CODE                                                                                                                     | PROCEDURE                                                                |
|--------------------------------------------------------------------------------------------------------------------------|--------------------------------------------------------------------------|
| D7720 <sup>†</sup>                                                                                                       | Maxilla-closed reduction                                                 |
| D7730*                                                                                                                   | Mandible-open reduction                                                  |
| D7740 <sup>†</sup>                                                                                                       | Mandible-closed reduction                                                |
| D7750 <sup>†</sup>                                                                                                       | Malar and/or zygomatic arch-open reduction                               |
| D7760 <sup>†</sup>                                                                                                       | Malar and/or zygomatic arch-closed reduction                             |
| D7770*                                                                                                                   | Alveolus-open reduction stabilization of teeth                           |
| D7771 <sup>†</sup>                                                                                                       | Alveolus-closed reduction stabilization of teeth                         |
| D7780 <sup>†</sup>                                                                                                       | Facial bones-complicated reduction with fixation and multiple approaches |
| Reduction of dislocation and management of other temporomandibular joint dysfunctions                                    |                                                                          |
| D7810 <sup>‡</sup>                                                                                                       | Open reduction of dislocation                                            |
| D7820 <sup>‡</sup>                                                                                                       | Closed reduction of dislocation                                          |
| D7830 <sup>‡</sup>                                                                                                       | Manipulation under anesthesia                                            |
| D7840 <sup>‡</sup>                                                                                                       | Condylectomy                                                             |
| D7850 <sup>‡</sup>                                                                                                       | Surgical discectomy, with/without implant                                |
| D7852 <sup>‡</sup>                                                                                                       | Disc repair                                                              |
| D7854 <sup>‡</sup>                                                                                                       | Synovectomy                                                              |
| D7856 <sup>‡</sup>                                                                                                       | Myotomy                                                                  |
| D7858 <sup>‡</sup>                                                                                                       | Joint reconstruction                                                     |
| D7860 <sup>‡</sup>                                                                                                       | Arthrotomy                                                               |
| D7865 <sup>‡</sup>                                                                                                       | Arthroplasty                                                             |
| D7870 <sup>‡</sup>                                                                                                       | Arthrocentesis                                                           |
| D7871 <sup>‡</sup>                                                                                                       | Nonarthroscopic lysis and lavage                                         |
| D7872 <sup>‡</sup>                                                                                                       | Arthroscopy-diagnosis, with or without biopsy                            |
| D7873 <sup>‡</sup>                                                                                                       | Arthroscopy: lavage and lysis of adhesions                               |
| D7874 <sup>‡</sup>                                                                                                       | Arthroscopy: disc repositioning and stabilization                        |
| D7875 <sup>‡</sup>                                                                                                       | Arthroscopy: synovectomy                                                 |
| D7876 <sup>‡</sup>                                                                                                       | Arthroscopy: discectomy                                                  |
| D7877 <sup>‡</sup>                                                                                                       | Arthroscopy: debridement                                                 |
| D7880 <sup>‡</sup>                                                                                                       | Occlusal orthotic device, by report                                      |
| D7881 <sup>‡</sup>                                                                                                       | Occlusal orthotic device adjustment                                      |
| D7899 <sup>‡</sup>                                                                                                       | Unspecified TMD therapy, by report                                       |
| Repair of traumatic wounds                                                                                               |                                                                          |
| D7910 <sup>‡</sup>                                                                                                       | Suture of recent small wounds up to 5 cm                                 |
| Complicated suturing (reconstruction requiring delicate handling of tissues and wide undermining for meticulous closure) |                                                                          |
| D7911 <sup>‡</sup>                                                                                                       | Complicated suture-up to 5 cm                                            |
| D7912 <sup>‡</sup>                                                                                                       | Complicated suture-greater than 5 cm                                     |
| Other repair procedures                                                                                                  |                                                                          |
| D7920 <sup>‡</sup>                                                                                                       | Skin graft (identify defect covered, location and type of graft)         |
| D7921 <sup>‡</sup>                                                                                                       | Collection and application of autologous blood concentrate product       |
| D7940 <sup>‡</sup>                                                                                                       | Osteoplasty-for orthognathic deformities                                 |
| D7941*                                                                                                                   | Osteotomy-mandibular rami                                                |
| D7943*                                                                                                                   | Osteotomy-mandibular rami with bone graft; includes obtaining the graft  |
| D7944*                                                                                                                   | Osteotomy-segmented or subapical                                         |



**eTable 3.** Continued

| <b>CODE</b>                         | <b>PROCEDURE</b>                                                                                               |
|-------------------------------------|----------------------------------------------------------------------------------------------------------------|
| D7945*                              | Osteotomy-body of mandible                                                                                     |
| D7946*                              | LeFort I (maxilla-total)                                                                                       |
| D7947*                              | LeFort I (maxilla-segmented)                                                                                   |
| D7948*                              | LeFort II or LeFort III (osteoplasty of facial bones for midface hypoplasia or retrusion)-without bone graft   |
| D7949*                              | LeFort II or LeFort III-with bone graft                                                                        |
| D7950*                              | Osseous, osteoperiosteal, or cartilage graft of the mandible or maxilla-autogenous or nonautogenous, by report |
| D7951 <sup>†</sup>                  | Sinus augmentation with bone or bone substitutes via a lateral open approach                                   |
| D7952*                              | Sinus augmentation via a vertical approach                                                                     |
| D7953*                              | Bone replacement graft for ridge preservation-per site                                                         |
| D7955*                              | Repair of maxillofacial soft and/or hard tissue defect                                                         |
| D7960*                              | Frenulectomy-also known as frenectomy or frenotomy-separate procedure not incidental to another procedure      |
| D7963*                              | Frenuloplasty                                                                                                  |
| D7970*                              | Excision of hyperplastic tissue-per arch                                                                       |
| D7971*                              | Excision of pericoronal gingiva                                                                                |
| D7972*                              | Surgical reduction of fibrous tuberosity                                                                       |
| D7980 <sup>†</sup>                  | Sialolithotomy                                                                                                 |
| D7981*                              | Excision of salivary gland, by report                                                                          |
| D7982*                              | Sialodochoplasty                                                                                               |
| D7983*                              | Closure of salivary fistula                                                                                    |
| D7990 <sup>†</sup>                  | Emergency tracheotomy                                                                                          |
| D7991*                              | Coronoidectomy                                                                                                 |
| D7995 <sup>†</sup>                  | Synthetic graft-mandible or facial bones, by report                                                            |
| D7996*                              | Implant-mandible for augmentation purposes (excluding alveolar ridge), by report                               |
| D7997*                              | Appliance removal (not by dentist who placed appliance), includes removal of archbar                           |
| D7998*                              | Intraoral placement of a fixation device not in conjunction with a fracture                                    |
| D7999 <sup>†</sup>                  | Unspecified oral surgery procedure, by report                                                                  |
| <b>D8000-D8999 Orthodontics</b>     |                                                                                                                |
| Limited orthodontic treatment       |                                                                                                                |
| D8010 <sup>†</sup>                  | Limited orthodontic treatment of the primary dentition                                                         |
| D8020 <sup>†</sup>                  | Limited orthodontic treatment of the transitional dentition                                                    |
| D8030 <sup>†</sup>                  | Limited orthodontic treatment of the adolescent dentition                                                      |
| D8040 <sup>†</sup>                  | Limited orthodontic treatment of the adult dentition                                                           |
| Interceptive orthodontic treatment  |                                                                                                                |
| D8050 <sup>†</sup>                  | Interceptive orthodontic treatment of the primary dentition                                                    |
| D8060 <sup>†</sup>                  | Interceptive orthodontic treatment of the transitional dentition                                               |
| Comprehensive orthodontic treatment |                                                                                                                |
| D8070 <sup>†</sup>                  | Comprehensive orthodontic treatment of the transitional dentition                                              |
| D8080 <sup>†</sup>                  | Comprehensive orthodontic treatment of the adolescent dentition                                                |
| D8090 <sup>†</sup>                  | Comprehensive orthodontic treatment of the adult dentition                                                     |

eTable 3. Continued

| CODE                                           | PROCEDURE                                                                                                   |
|------------------------------------------------|-------------------------------------------------------------------------------------------------------------|
| Minor treatment to control harmful habits      |                                                                                                             |
| D8210 <sup>‡</sup>                             | Removable appliance therapy                                                                                 |
| D8220 <sup>‡</sup>                             | Fixed appliance therapy                                                                                     |
| Other orthodontic services                     |                                                                                                             |
| D8660 <sup>‡</sup>                             | Pre-orthodontic treatment examination to monitor growth and development                                     |
| D8670 <sup>‡</sup>                             | Periodic orthodontic treatment visit                                                                        |
| D8680 <sup>‡</sup>                             | Orthodontic retention (removal of appliances, construction and placement of retainer(s))                    |
| D8681 <sup>‡</sup>                             | Removable orthodontic retainer adjustment                                                                   |
| D8690 <sup>‡</sup>                             | Orthodontic treatment (alternative billing to a contract fee)                                               |
| D8691 <sup>‡</sup>                             | Repair of orthodontic appliance                                                                             |
| D8692 <sup>‡</sup>                             | Replacement of lost or broken retainer                                                                      |
| D8693 <sup>‡</sup>                             | Re-cement or re-bond fixed retainer                                                                         |
| D8694 <sup>‡</sup>                             | Repair of fixed retainers, includes reattachment                                                            |
| D8999 <sup>‡</sup>                             | Unspecified orthodontic procedure, by report                                                                |
| <b>D9000-D9999 Adjunctive General Services</b> |                                                                                                             |
| Unclassified treatment                         |                                                                                                             |
| D9110 <sup>‡</sup>                             | Palliative (emergency) treatment of dental pain-minor procedure                                             |
| D9120 <sup>‡</sup>                             | Fixed partial denture sectioning                                                                            |
| Anesthesia                                     |                                                                                                             |
| D9210 <sup>‡</sup>                             | Local anesthesia not in conjunction with operative or surgical procedures                                   |
| D9211 <sup>‡</sup>                             | Regional block anesthesia                                                                                   |
| D9212 <sup>‡</sup>                             | Trigeminal division block anesthesia                                                                        |
| D9215 <sup>‡</sup>                             | Local anesthesia in conjunction with operative or surgical procedures                                       |
| D9219 <sup>‡</sup>                             | Evaluation for deep sedation or general anesthesia                                                          |
| D9223 <sup>‡</sup>                             | Deep sedation/general anesthesia-each 15-minute increment                                                   |
| D9230 <sup>‡</sup>                             | Inhalation of nitrous oxide/analgesia, anxiolysis                                                           |
| D9243 <sup>‡</sup>                             | Intravenous moderate (conscious) sedation/analgesia-each 15-minute increment                                |
| D9248 <sup>‡</sup>                             | Nonintravenous conscious sedation                                                                           |
| Professional consultation                      |                                                                                                             |
| D9310 <sup>‡</sup>                             | Consultation-diagnostic service provided by dentist or physician other than requesting dentist or physician |
| D9311 <sup>‡</sup>                             | Consultation with a medical health care professional                                                        |
| Professional visits                            |                                                                                                             |
| D9410 <sup>‡</sup>                             | House/extended care facility call                                                                           |
| D9420 <sup>‡</sup>                             | Hospital or ambulatory surgical center call                                                                 |
| D9430 <sup>‡</sup>                             | Office visit for observation (during regularly scheduled hours)-no other services performed                 |
| D9440 <sup>‡</sup>                             | Office visit-after regularly scheduled hours                                                                |
| D9450 <sup>‡</sup>                             | Case presentation, detailed and extensive treatment planning                                                |
| Drugs                                          |                                                                                                             |
| D9610 <sup>‡</sup>                             | Therapeutic parenteral drug, single administration                                                          |
| D9612 <sup>‡</sup>                             | Therapeutic parenteral drugs, 2 or more administrations, different medications                              |
| D9630 <sup>‡</sup>                             | Drugs or medicaments dispensed in the office for home use                                                   |

**eTable 3.** Continued

| <b>CODE</b>                   | <b>PROCEDURE</b>                                                                                      |
|-------------------------------|-------------------------------------------------------------------------------------------------------|
| <b>Miscellaneous services</b> |                                                                                                       |
| D9910 <sup>†</sup>            | Application of desensitizing medicament                                                               |
| D9911 <sup>†</sup>            | Application of desensitizing resin for cervical and/or root surface, per tooth                        |
| D9920 <sup>†</sup>            | Behavior management, by report                                                                        |
| D9930 <sup>†</sup>            | Treatment of complications (post-surgical)-unusual circumstances, by report                           |
| D9932 <sup>†</sup>            | Cleaning and inspection of removable complete denture, maxillary                                      |
| D9933 <sup>†</sup>            | Cleaning and inspection of removable complete denture, mandibular                                     |
| D9934 <sup>†</sup>            | Cleaning and inspection of removable partial denture, maxillary                                       |
| D9935 <sup>†</sup>            | Cleaning and inspection of removable partial denture, mandibular                                      |
| D9940 <sup>†</sup>            | Occlusal guard, by report                                                                             |
| D9941 <sup>†</sup>            | Fabrication of athletic mouthguard                                                                    |
| D9942 <sup>†</sup>            | Repair and/or reline of occlusal guard                                                                |
| D9943 <sup>†</sup>            | Occlusal guard adjustment                                                                             |
| D9950 <sup>†</sup>            | Occlusion analysis-mounted case                                                                       |
| D9951 <sup>†</sup>            | Occlusal adjustment-limited                                                                           |
| D9952 <sup>†</sup>            | Occlusal adjustment-complete                                                                          |
| D9970 <sup>†</sup>            | Enamel microabrasion                                                                                  |
| D9971 <sup>†</sup>            | Odontoplasty 1-2 teeth; includes removal of enamel projections                                        |
| D9972 <sup>†</sup>            | External bleaching-per arch-performed in office                                                       |
| D9973 <sup>†</sup>            | External bleaching-per tooth                                                                          |
| D9974 <sup>†</sup>            | Internal bleaching-per tooth                                                                          |
| D9975 <sup>†</sup>            | External bleaching for home application, per arch; includes materials and fabrication of custom trays |
| <b>Nonclinical procedures</b> |                                                                                                       |
| D9985 <sup>†</sup>            | Sales tax                                                                                             |
| D9986 <sup>†</sup>            | Missed appointment                                                                                    |
| D9987 <sup>†</sup>            | Cancelled appointment                                                                                 |
| D9991 <sup>†</sup>            | Dental case management-addressing appointment compliance barriers                                     |
| D9992 <sup>†</sup>            | Dental case management-care coordination                                                              |
| D9993 <sup>†</sup>            | Dental case management-motivational interviewing                                                      |
| D9994 <sup>†</sup>            | Dental case management-patient education to improve oral health literacy                              |
| D9999 <sup>†</sup>            | Unspecified adjunctive procedure, by report                                                           |

**eTable 4.** *International Classification of Diseases, Ninth Revision, Clinical Modification* codes for identifying invasive dental procedures.

| CODE              | PROCEDURE DESCRIPTION                                   | SHORT DESCRIPTION                 |
|-------------------|---------------------------------------------------------|-----------------------------------|
| 2301*             | Deciduous tooth extract                                 | Deciduous tooth extract           |
| 2309*             | Extraction of other tooth                               | Tooth extraction NEC <sup>§</sup> |
| 2311*             | Removal of residual root                                | Residual root removal             |
| 2319*             | Other surgical extraction of tooth                      | Surg tooth extract NEC            |
| 232 <sup>†</sup>  | Restoration of tooth by filling                         | Tooth restor by filling           |
| 233 <sup>†</sup>  | Restoration of tooth by inlay                           | Tooth restorat by inlay           |
| 2341 <sup>†</sup> | Application of crown                                    | Crown application                 |
| 2342 <sup>†</sup> | Insertion of fixed bridge                               | Fixed bridge insertion            |
| 2343 <sup>†</sup> | Insertion of removable bridge                           | Insert removable bridge           |
| 2349 <sup>†</sup> | Other dental restoration                                | Dental restoration NEC            |
| 235*              | Implantation of tooth                                   | Tooth implantation                |
| 236*              | Prosthetic dental implant                               | Prosthet dental implant           |
| 2370*             | Root canal, not otherwise specified                     | Root canal NOS                    |
| 2371*             | Root canal therapy with irrigation                      | Root canal w irrigation           |
| 2372*             | Root canal therapy with apicoectomy                     | Root canal w apicoectomy          |
| 2373*             | Apicoectomy                                             | Apicoectomy                       |
| 240*              | Incision of gum or alveolar bone                        | Gum or alveolar incision          |
| 2411*             | Biopsy of gum                                           | Gum biopsy                        |
| 2412*             | Biopsy of alveolus                                      | Alveolus biopsy                   |
| 2419 <sup>‡</sup> | Other diagnostic procedures on teeth, gums, and alveoli | Tooth & gum dx proc NEC           |
| 242*              | Gingivoplasty                                           | Gingivoplasty                     |
| 2431*             | Excision of lesion or tissue of gum                     | Gum lesion excision               |
| 2432*             | Suture of laceration of gum                             | Suture of gum laceration          |
| 2439*             | Other operations on gum                                 | Gum operation NEC                 |
| 244*              | Excision of dental lesion of jaw                        | Exc of dental les of jaw          |
| 245*              | Alveoloplasty                                           | Alveoloplasty                     |
| 246*              | Exposure of tooth                                       | Exposure of tooth                 |
| 247 <sup>†</sup>  | Application of orthodontic appliance                    | Orthodon applianc applic          |
| 248 <sup>†</sup>  | Other orthodontic operation                             | Other orthodontic operat          |
| 2491*             | Extension or deepening of buccolabial or lingual sulcus | Exten buccolabial/sulcus          |
| 2499*             | Other dental operations                                 | Dental operation NEC              |
| 2501 <sup>‡</sup> | Closed [needle] biopsy of tongue                        | Closed biopsy of tongue           |
| 2502*             | Open biopsy of tongue                                   | Open biopsy of tongue             |
| 2509 <sup>‡</sup> | Other diagnostic procedures on tongue                   | Tongue dx procedure NEC           |
| 251*              | Excision or destruction of lesion or tissue of tongue   | Destruction tongue les            |
| 252*              | Partial glossectomy                                     | Partial glossectomy               |
| 253*              | Complete glossectomy                                    | Complete glossectomy              |
| 254*              | Radical glossectomy                                     | Radical glossectomy               |
| 2551*             | Suture of laceration of tongue                          | Suture of tongue lacerat          |
| 2559*             | Other repair and plastic operations on tongue           | Repair of tongue NEC              |
| 2591*             | Lingual frenotomy                                       | Lingual frenotomy                 |
| 2592*             | Lingual frenectomy                                      | Lingual frenectomy                |

\* Invasive dental procedure that "should" be covered with antibiotic prophylaxis. † Invasive dental procedures that "may" be covered with antibiotic prophylaxis. ‡ Noninvasive. § NEC: Not elsewhere classified. Source: Centers for Disease Control and Prevention.<sup>11</sup>

eTable 4. Continued

| CODE              | PROCEDURE DESCRIPTION                                            | SHORT DESCRIPTION         |
|-------------------|------------------------------------------------------------------|---------------------------|
| 2593*             | Lysis of adhesions of tongue                                     | Lysis of tongue adhesion  |
| 2594*             | Other glossotomy                                                 | Other glossotomy          |
| 2599*             | Other operations on tongue                                       | Tongue operation NEC      |
| 260*              | Incision of salivary gland or duct                               | Incis salivary gland/duct |
| 2611 <sup>†</sup> | Closed [needle] biopsy of salivary gland or duct                 | Clos bx saliv gland/duct  |
| 2612*             | Open biopsy of salivary gland or duct                            | Open bx saliv gland/duct  |
| 2619*             | Other diagnostic procedures on salivary glands and ducts         | Saliv gland dx proc NEC   |
| 2621*             | Marsupialization of salivary gland cyst                          | Salivary cyst marsupial   |
| 2629*             | Other excision of salivary gland lesion                          | Saliv lesion excis NEC    |
| 2630*             | Sialoadenectomy, not otherwise specified                         | Sialoadenectomy NOS       |
| 2631*             | Partial sialoadenectomy                                          | Partial sialoadenectomy   |
| 2632*             | Complete sialoadenectomy                                         | Complete sialoadenectomy  |
| 2641*             | Suture of laceration of salivary gland                           | Suture of saliv gland lac |
| 2642*             | Closure of salivary fistula                                      | Salivary fistula closure  |
| 2649*             | Other repair and plastic operations on salivary gland or duct    | Salivary repair NEC       |
| 2691 <sup>†</sup> | Probing of salivary duct                                         | Salivary duct probing     |
| 2699 <sup>†</sup> | Other operations on salivary gland or duct                       | Salivary operation NEC    |
| 270*              | Drainage of face and floor of mouth                              | Drain face & mouth floor  |
| 271*              | Incision of palate                                               | Incision of palate        |
| 2721*             | Biopsy of bony palate                                            | Bony palate biopsy        |
| 2722*             | Biopsy of uvula and soft palate                                  | Uvula and soft palate bx  |
| 2723*             | Biopsy of lip                                                    | Lip biopsy                |
| 2724*             | Biopsy of mouth, unspecified structure                           | Mouth biopsy NOS          |
| 2729 <sup>†</sup> | Other diagnostic procedures on oral cavity                       | Oral cavity dx proc NEC   |
| 2731*             | Local excision or destruction of lesion or tissue of bony palate | Loc exc bony palate les   |
| 2732*             | Wide excision or destruction of lesion or tissue of bony palate  | Wide exc bony palate les  |
| 2741*             | Labial frenectomy                                                | Labial frenumectomy       |
| 2742*             | Wide excision of lesion of lip                                   | Wide excision of lip les  |
| 2743*             | Other excision of lesion or tissue of lip                        | Excision of lip les NEC   |
| 2749*             | Other excision of mouth                                          | Excision of mouth NEC     |
| 2751*             | Suture of laceration of lip                                      | Suture of lip laceration  |
| 2752*             | Suture of laceration of other part of mouth                      | Suture of mouth lac NEC   |
| 2753*             | Closure of fistula of mouth                                      | Closure of mouth fistula  |
| 2754*             | Repair of cleft lip                                              | Repair of cleft lip       |
| 2755*             | Full-thickness skin graft to lip and mouth                       | Full-thick grft to mouth  |
| 2756*             | Other skin graft to lip and mouth                                | Skin graft to mouth NEC   |
| 2757*             | Attachment of pedicle or flap graft to lip and mouth             | Pedicle attach to mouth   |
| 2759*             | Other plastic repair of mouth                                    | Mouth repair NEC          |
| 2761*             | Suture of laceration of palate                                   | Suture of palate lacerat  |
| 2762*             | Correction of cleft palate                                       | Cleft palate correction   |
| 2763*             | Revision of cleft palate repair                                  | Revis cleft palat repair  |
| 2764*             | Insertion of palatal implant                                     | Insert palatal implant    |
| 2769*             | Other plastic repair of palate                                   | Oth plastic repair palat  |

**eTable 4.** Continued

| <b>CODE</b> | <b>PROCEDURE DESCRIPTION</b>               | <b>SHORT DESCRIPTION</b> |
|-------------|--------------------------------------------|--------------------------|
| 2771*       | Incision of uvula                          | Incision of uvula        |
| 2772*       | Excision of uvula                          | Excision of uvula        |
| 2773*       | Repair of uvula                            | Repair of uvula          |
| 2779*       | Other operations on uvula                  | Other uvula operations   |
| 2791*       | Labial frenotomy                           | Labial frenotomy         |
| 2792*       | Incision of mouth, unspecified structure   | Mouth incision NOS       |
| 2799*       | Other operations on oral cavity            | Oral cavity ops NEC      |
| 9654*       | Dental scaling, polishing, and debridement | Dental scaling & debride |

**eTable 5.** American Dental Association Code on Dental Procedures and Nomenclature (CDT) and *International Classification of Diseases*, Ninth Revision, Clinical Modification (ICD-9-CM) red procedure codes, red and yellow procedure codes, and procedure codes for specific types of invasive dental procedure.

| ANALYSES                                                                                                                                                             | CDT CODES                                                                                                                                                                                                                                                                                                                                                                                                                                                                                                                                                                                                                                                                                                                                                                                                                                                                                                                                                                                                                                                                                                                                                                                                                                                                                            | ICD-9-CM CODES                                                                                                                                                                                                                                                                                                                                                                               |
|----------------------------------------------------------------------------------------------------------------------------------------------------------------------|------------------------------------------------------------------------------------------------------------------------------------------------------------------------------------------------------------------------------------------------------------------------------------------------------------------------------------------------------------------------------------------------------------------------------------------------------------------------------------------------------------------------------------------------------------------------------------------------------------------------------------------------------------------------------------------------------------------------------------------------------------------------------------------------------------------------------------------------------------------------------------------------------------------------------------------------------------------------------------------------------------------------------------------------------------------------------------------------------------------------------------------------------------------------------------------------------------------------------------------------------------------------------------------------------|----------------------------------------------------------------------------------------------------------------------------------------------------------------------------------------------------------------------------------------------------------------------------------------------------------------------------------------------------------------------------------------------|
| <b>All Red Invasive Dental Procedure Codes, Those Procedures That “Should” Be Covered By AP<sup>†</sup> According to the 2007 AHA<sup>§</sup> Recommendations</b>    | D0180,* D0472-4,* D1110,* D1120,* D3221,* D3310,* D3320,* D3330,* D3332-3,* D3346-8,* D3351-3,* D3410,* D3421,* D3425-32,* D3450,* D3460,* D3470,* D3910,* D3920,* D4210-2,* D4230-1,* D4240-1,* D4245,* D4249,* D4260-1,* D4263-8,* D4270,* D4273-8,* D4283,* D4341-2,* D4346,* D4355,* D4381,* D4910,* D4921,* D6010-3,* D6040,* D6050,* D6080-1,* D6100-4,* D7111,* D7140,* D7210,* D7220,* D7230,* D7240-1,* D7250-1,* D7260-1,* D7270,* D7272,* D7280,* D7282-3,* D7285-6,* D7290-5,* D7310-1,* D7320-1,* D7340,* D7350,* D7410-5,* D7465,* D7440-1,* D7450-1,* D7460-1,* D7471-3,* D7485,* D7490,* D7510-1,* D7520-1,* D7530,* D7540,* D7550,* D7560,* D7610,* D7630,* D7671,* D7710,* D7730,* D7770,* D7941,* D7943-50,* D7952-3,* D7955,* D7960,* D7963,* D7970-2,* D7981-3,* D7991,* D7996-8*                                                                                                                                                                                                                                                                                                                                                                                                                                                                                               | 2301,* 2309,* 2311,* 2319,* 235,* 236,* 2370-3,* 240,* 2411-2,* 242,* 2431-2,* 2439,* 244,* 245,* 246,* 2491,* 2499,* 2502,* 251,* 252,* 253,* 254,* 2551,* 2559,* 2591-4,* 2599,* 260,* 2612,* 2621,* 2629-32,* 2641-2,* 2649,* 270,* 271,* 2721-4,* 2731-2,* 2741-3,* 2749,* 2751-7,* 2759,* 2761-4,* 2769,* 2771-3,* 2779,* 2791-2,* 2799,* 9654*                                         |
| <b>All Yellow Invasive Dental Procedure Codes, Those Procedures That “May” Be Covered by AP According to the 2007 AHA Recommendations</b>                            | D0120,† D0150,† D2150,† D2160,† D2330-2,† D2335,† D2390,† D2392-4,† D2520,† D2530,† D2542-4,† D2620,† D2630,† D2642-4,† D2651-2,† D2662-4,† D2710,† D2712,† D2720-2,† D2740,† D2750-2,† D2780-3,† D2790-2,† D2794,† D2799,† D2929-34,† D2960-2,† D4999,† D6051-2,† D6055-7,† D6065-7,† D6075-7,† D6545,† D6548-9,† D6600-15,† D6624,† D6634,† D6710,† D6720-2,† D6740,† D6750-2,† D6780-3,† D6790-4,† D7620,† D7640,† D7650,† D7660,† D7670,† D7680,† D7720,† D7740,† D7750,† D7760,† D7771,† D7780†                                                                                                                                                                                                                                                                                                                                                                                                                                                                                                                                                                                                                                                                                                                                                                                                 | 232,† 233,† 2341,† 2342,† 2343,† 2349†                                                                                                                                                                                                                                                                                                                                                       |
| <b>All Red and Yellow Invasive Dental Procedure Codes, Those Procedures That Either “Should” or “May” be Covered by AP According to the 2007 AHA Recommendations</b> | D0120,† D0150,† D0180,* D0472-4,* D1110,* D1120,* D2150,† D2160-1,† D2330-2,† D2335,† D2390,† D2392-4,† D2520,† D2530,† D2542-4,† D2620,† D2630,† D2642-4,† D2651-2,† D2662-4,† D2710,† D2712,† D2720-2,† D2740,† D2750-2,† D2780-3,† D2790-2,† D2794,† D2799,† D2929-34,† D3221,* D3310,* D3320,* D3330,* D3332-3,* D3346-8,* D3351-3,* D3410,* D3421,* D3425-32,* D3450,* D3460,* D3470,* D3910,* D3920,* D4210-2,* D4230-1,* D4240-1,* D4245,* D4249,* D4260-1,* D4263-8,* D4270,* D4273-8,* D4283,* D4341-2,* D4346,* D4355,* D4381,* D4910,* D4921,* D4999,† D6010-3,* D6040,* D6050,* D6051-2,† D6055-7,† D6065-7,† D6075-7,† D6080-1,† D6100-4,† D6545,† D6548-9,† D6600-15,† D6624,† D6634,† D6710,† D6720-2,† D6740,† D6750-2,† D6780-3,† D6790-4,† D7111,* D7140,* D7210,* D7220,* D7230,* D7240-1,* D7250-1,* D7260-1,* D7270,* D7272,* D7280,* D7282-3,* D7285-6,* D7290-5,* D7310-1,* D7320-1,* D7340,* D7350,* D7410-5,* D7465,* D7440-1,* D7450-1,* D7460-1,* D7471-3,* D7485,* D7490,* D7510-1,* D7520-1,* D7530,* D7540,* D7550,* D7560,* D7610,* D7620,† D7630,* D7640,† D7650,† D7660,† D7670,† D7671,* D7680,† D7710,* D7720,† D7730,* D7740,† D7750,† D7760,† D7770,* D7771,† D7780,† D7941,* D7943-50,* D7952-3,* D7955,* D7960,* D7963,* D7970-2,* D7981-3,* D7991,* D7996-8* | 2301,* 2309,* 2311,* 2319,* 232,† 233,† 2341,† 2342,† 2343,† 2349,† 235,* 236,* 2370-3,* 240,* 2411-2,* 242,* 2431-2,* 2439,* 244,* 245,* 246,* 2491,* 2499,* 2502,* 251,* 252,* 253,* 254,* 2551,* 2559,* 2591-4,* 2599,* 260,* 2612,* 2621,* 2629-32,* 2641-2,* 2649,* 270,* 271,* 2721-4,* 2731-2,* 2741-3,* 2749,* 2751-7,* 2759,* 2761-4,* 2769,* 2771-3,* 2779,* 2791-2,* 2799,* 9654* |
| <b>Codes for Specific Types of Invasive Dental Procedure</b>                                                                                                         |                                                                                                                                                                                                                                                                                                                                                                                                                                                                                                                                                                                                                                                                                                                                                                                                                                                                                                                                                                                                                                                                                                                                                                                                                                                                                                      |                                                                                                                                                                                                                                                                                                                                                                                              |
| Periodontal probing                                                                                                                                                  | D0180,*                                                                                                                                                                                                                                                                                                                                                                                                                                                                                                                                                                                                                                                                                                                                                                                                                                                                                                                                                                                                                                                                                                                                                                                                                                                                                              | None*                                                                                                                                                                                                                                                                                                                                                                                        |
| All scaling                                                                                                                                                          | D1110,* D1120,* D4341-2,* D4346,* D4355,* D4381,* D4910,* D4921,*                                                                                                                                                                                                                                                                                                                                                                                                                                                                                                                                                                                                                                                                                                                                                                                                                                                                                                                                                                                                                                                                                                                                                                                                                                    | 9654*                                                                                                                                                                                                                                                                                                                                                                                        |
| Supra-gingival scaling                                                                                                                                               | D1110,* D1120,*                                                                                                                                                                                                                                                                                                                                                                                                                                                                                                                                                                                                                                                                                                                                                                                                                                                                                                                                                                                                                                                                                                                                                                                                                                                                                      |                                                                                                                                                                                                                                                                                                                                                                                              |
| Subgingival scaling                                                                                                                                                  | D4341-2,* D4346,* D4355,* D4381,* D4910,* D4921,*                                                                                                                                                                                                                                                                                                                                                                                                                                                                                                                                                                                                                                                                                                                                                                                                                                                                                                                                                                                                                                                                                                                                                                                                                                                    |                                                                                                                                                                                                                                                                                                                                                                                              |
| Periodontal surgery                                                                                                                                                  | D4210-2,* D4230-1,* D4240-1,* D4245,* D4249,* D4260-1,* D4263-8,* D4270,* D4273-8,* D4283,*                                                                                                                                                                                                                                                                                                                                                                                                                                                                                                                                                                                                                                                                                                                                                                                                                                                                                                                                                                                                                                                                                                                                                                                                          | 240,* 2411-2,* 242,* 2431-2,* 2439,*                                                                                                                                                                                                                                                                                                                                                         |
| Extractions                                                                                                                                                          | D7111,* D7140,* D7210,* D7220,* D7230,* D7240-1,* D7250-1,*                                                                                                                                                                                                                                                                                                                                                                                                                                                                                                                                                                                                                                                                                                                                                                                                                                                                                                                                                                                                                                                                                                                                                                                                                                          | 2301,* 2309,* 2311,* 2319,*                                                                                                                                                                                                                                                                                                                                                                  |
| Endodontic treatment                                                                                                                                                 | D3221,* D3310,* D3320,* D3330,* D3332-3,* D3346-8,* D3351-3,* D3410,* D3421,* D3425-32,* D3450,* D3460,* D3470,* D3910,* D3920,*                                                                                                                                                                                                                                                                                                                                                                                                                                                                                                                                                                                                                                                                                                                                                                                                                                                                                                                                                                                                                                                                                                                                                                     | 2370-3,*                                                                                                                                                                                                                                                                                                                                                                                     |
| Oral surgery (including biopsy)                                                                                                                                      | D0472-4,* D7260-1,* D7270,* D7272,* D7280,* D7282-3,* D7285-6,* D7290-5,* D7310-1,* D7320-1,* D7340,* D7350,* D7410-5,* D7465,* D7440-1,* D7450-1,* D7460-1,* D7471-3,* D7485,* D7490,* D7510-1,* D7520-1,* D7530,* D7540,* D7550,* D7560,* D7610,* D7630,* D7671,* D7710,* D7730,* D7770,* D7941,* D7943-50,* D7952-3,* D7955,* D7960,* D7963,* D7970-2,* D7981-3,* D7991,* D7996-8*                                                                                                                                                                                                                                                                                                                                                                                                                                                                                                                                                                                                                                                                                                                                                                                                                                                                                                                | 244,* 245,* 246,* 2491,* 2499,* 2502,* 251,* 252,* 253,* 254,* 2551,* 2559,* 2591-4,* 2599,* 260,* 2612,* 2621,* 2629-32,* 2641-2,* 2649,* 270,* 271,* 2721-4,* 2731-2,* 2741-3,* 2749,* 2751-7,* 2759,* 2761-4,* 2769,* 2771-3,* 2779,* 2791-2,* 2799,*                                                                                                                                     |
| Implant procedures                                                                                                                                                   | D6010-3,* D6040,* D6050,* D6080-1,* D6100-4,*                                                                                                                                                                                                                                                                                                                                                                                                                                                                                                                                                                                                                                                                                                                                                                                                                                                                                                                                                                                                                                                                                                                                                                                                                                                        | 235,* 236,*                                                                                                                                                                                                                                                                                                                                                                                  |
| Restorative procedures                                                                                                                                               | D2150,† D2160-1,† D2330-2,† D2335,† D2390,† D2392-4,† D2520,† D2530,† D2542-4,† D2620,† D2630,† D2642-4,† D2651-2,† D2662-4,† D2710,† D2712,† D2720-2,† D2740,† D2750-2,† D2780-3,† D2790-2,† D2794,† D2799,† D2929-34,† D2960-2,†                                                                                                                                                                                                                                                                                                                                                                                                                                                                                                                                                                                                                                                                                                                                                                                                                                                                                                                                                                                                                                                                   | 232,† 233,† 2341,† 2342,† 2343,† 2349,†                                                                                                                                                                                                                                                                                                                                                      |

\* Invasive dental procedure that “should” be covered with antibiotic prophylaxis. † Invasive dental procedures that “may” be covered with antibiotic prophylaxis. ‡ AP: Antibiotic prophylaxis. § AHA: American Heart Association. Source: Centers for Disease Control and Prevention.<sup>11</sup> Wilson and Colleagues.<sup>4</sup>
